# Supplementary material
Source: PubMed Central journal article supplement (PMC3675993)
Supplement: EC.00355-12_zek999094116so1.pdf [file EC.00355-12_zek999094116so1.pdf]

**Table S1:** Primer sequences used in this study. All the primers are presented in 5'–3' direction.

| Name        | Sequence                            |
|-------------|-------------------------------------|
| Rasdown1    | GACCGCAGCCCCCTCCTTCTC               |
| Rasup2      | CTGAAGCAAGACAGCGACGGCAGA            |
| RasPromdown | GGTGTGCAATGATTTTCCTTCGTGATG         |
| ras-1       | GCATCCCGCTCCACATTC                  |
| ras-2       | ACACTTCCCGCTCGTAGGTC                |
| G12V-1      | GCAGTACTAGGCGATGTTGGGGTGGGCAAACCCGC |
| G12V-2      | GCGGTTTTGCCCACCCAACATCGCCTAGTACTGC  |
| Q61L-1      | TCATAGACACTGCCGGACTGGGTGCGTGCTTGAC  |
| Q61L-2      | GTGCAAGCACGCACCCAGTCCGGCAGTGTCTATGA |
| G15N-1      | CGATGGTGGGGTGAACAAAACCGCTCTCGCAGTC  |
| G15N-2      | GACTGCGAGAGCGGTTTTGTTACCCCCACCATCG  |
| tef-1       | AGCTTGGCAAGGGTTCCTTCA               |
| tef-2       | AACTTCCAGAGGGCGATATCA               |

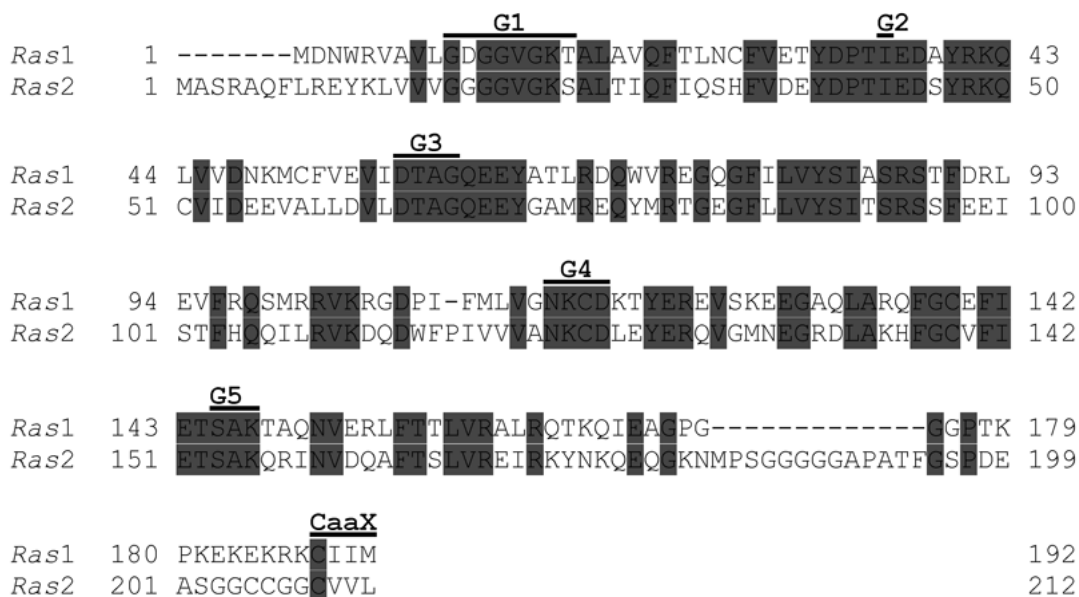

**Figure S2:** Sequence alignment of Ras1 (protein ID 45883) and Ras2 (protein ID 67931) of *Schizophyllum commune*. Position of five domains involved in GTP binding/hydrolysis (G1-G5) and the CaaX prenylation motif at the C-terminus are indicated. The sequences were aligned with CLUSTALX.

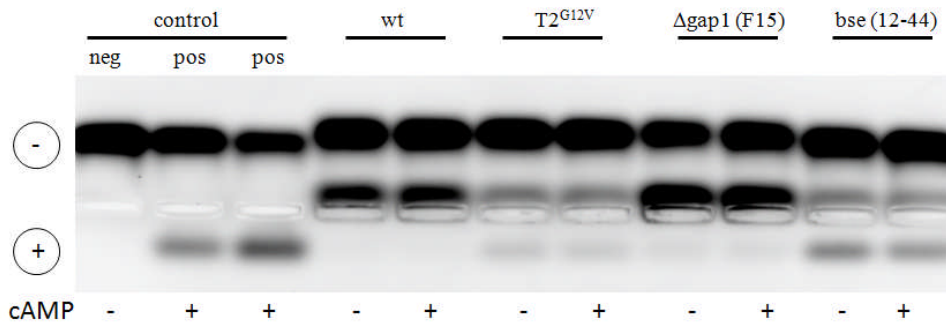

**Figure S3:** Examination of the cAMP dependent PKA activity using protein extracts of different Ras mutant strains. The original mutant *bse* strain with a reported increase of intracellular cAMP concentration showed the highest PKA activation compared to constitutive active Ras1 and  $\Delta$ gap1 strains.

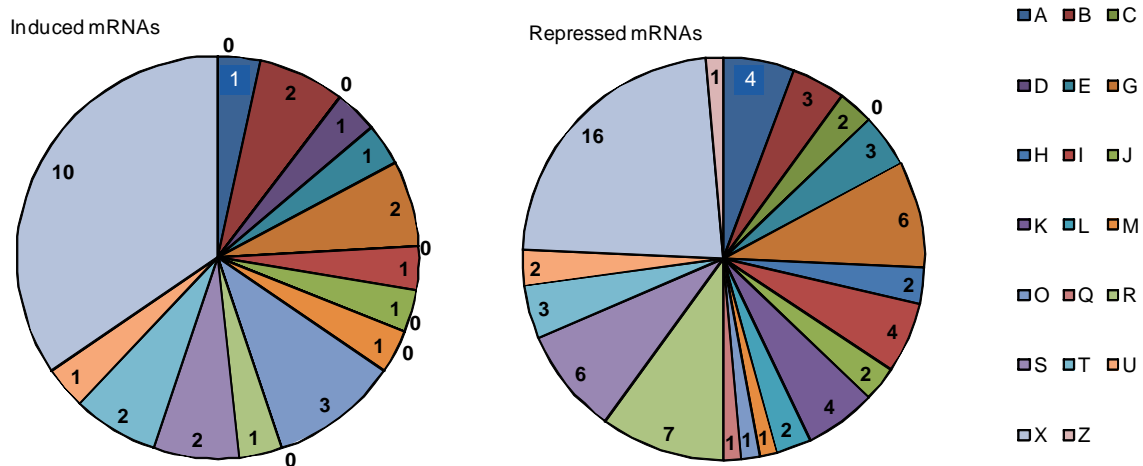

**Figure S4:** Detailed KOG classification of transcriptionally regulated mRNAs in *S. commune* Ras<sup>G12V</sup> mutant. Numbers indicate the number of regulated mRNA in this functional group ( $P \leq 0.05$ , fold change  $\geq 3 / \leq -3$ ). Detailed KOG classification: A, RNA processing and modification; B, chromatin structure and dynamics; C, energy production and conversion; D, cell cycle control, cell division, chromosome partitioning; E, amino acid transport and metabolism; F, nucleotide transport and metabolism; G, carbohydrate transport and metabolism; H, coenzyme transport and metabolism; I, lipid transport and metabolism; J, translation, ribosomal structure and biogenesis; K, transcription; L, replication, recombination, and repair; M, cell all/membrane/envelope biogenesis; N, cell motility; O, posttranslational modification, protein turnover, chaperones; P, inorganic ion transport and metabolism; Q, secondary metabolites biosynthesis, transport and catabolism; R, general function prediction only; S, function unknown; T, signal transduction; U,

intracellular trafficking, secretion, and vesicular transport; V, defense mechanisms; W, extracellular structures; Y, nuclear structure; Z, cytoskeleton.

**Table S5:** Differentially regulated genes in Ras1 mutant T2<sup>G12V</sup>. Fold = fold change. Putative function written in bold letters indicates annotation of genome, written in normal letters are Blastp results. The effected genes are not regulated in the other mutant strains.

| 12-43 vs. 4-39         |          | Ras1 vs. 12-43 |          | Ras1 vs. 4-39 |          | protein ID | putative function                                                                                                |
|------------------------|----------|----------------|----------|---------------|----------|------------|------------------------------------------------------------------------------------------------------------------|
| Fold                   | pValue   | Fold           | pValue   | Fold          | pValue   |            |                                                                                                                  |
| <b>INDUCED GENES</b>   |          |                |          |               |          |            |                                                                                                                  |
| 1.32                   | 2.81E-01 | 1844           | 3.04E-16 | 2425.5        | 1.68E-16 | 82266      | <b>Transketolase. Pentose phosphate pathway</b>                                                                  |
| -1.5                   | 3.70E-01 | 260.9          | 6.51E-10 | 172.54        | 2.11E-09 | 13593      | <b>Nucleolar protein NOP52/RRP1</b>                                                                              |
| -1.4                   | 6.29E-01 | 36.25          | 7.03E-05 | 25.84         | 1.96E-04 | 234329     | <b>Glycoside hydrolase. chitinase active site</b>                                                                |
| 1.19                   | 7.75E-01 | 30.61          | 3.06E-05 | 36.51         | 1.71E-05 | 77889      | <b>Histone deacetylase complex. catalytic component RPD3</b>                                                     |
| 1.28                   | 7.21E-01 | 16.76          | 6.17E-04 | 21.4          | 2.84E-04 | 48206      | <b>Meiotic cell division protein Pelota/DOM34. eRF1 domain 1. Probable translation factor pelota</b>             |
| 1.2                    | 6.05E-01 | 16.57          | 2.56E-07 | 19.84         | 1.08E-07 | 111002     | <b>Putative RNA binding protein</b>                                                                              |
| 1.76                   | 3.69E-01 | 15.35          | 3.48E-04 | 27            | 5.04E-05 | 236254     | <b>FOG: Low-complexity</b>                                                                                       |
| -1.6                   | 3.69E-01 | 15.14          | 5.32E-05 | 9.48          | 3.68E-04 | 53495      | <b>SWI-SNF chromatin remodeling complex. Snf5 subunit</b>                                                        |
| 1.62                   | 5.15E-01 | 13.79          | 2.10E-03 | 22.31         | 5.00E-04 | 105160     | <b>Cyclin-like F-box</b>                                                                                         |
| -1.4                   | 6.34E-01 | 11.74          | 1.64E-03 | 8.53          | 4.69E-03 | 83710      | <b>C-type lectin</b>                                                                                             |
| 1.22                   | 8.51E-01 | 9.29           | 4.54E-02 | 11.31         | 3.11E-02 | 235404     | <b>Aldehyde dehydrogenase</b>                                                                                    |
| -2                     | 2.48E-01 | 8.68           | 1.52E-03 | 4.38          | 1.96E-02 | 238773     | <b>SPRT-like metalloprotease</b>                                                                                 |
| 1.15                   | 8.56E-01 | 6.71           | 2.45E-02 | 7.74          | 1.68E-02 | 111240     | <b>Gluconate transport-inducing protein</b>                                                                      |
| 1.09                   | 8.67E-01 | 6.35           | 1.36E-03 | 6.9           | 9.39E-04 | 106922     | <b>Polo-like serine/threonine protein kinase</b>                                                                 |
| -1.1                   | 8.78E-01 | 5.46           | 2.20E-02 | 4.92          | 3.02E-02 | 106206     | <b>Thioredoxin-related. cell redox homeostasis</b>                                                               |
| 1.07                   | 7.41E-01 | 4.16           | 3.27E-06 | 4.47          | 1.76E-06 | 15188      | <b>Predicted pilin-like transcription factor. peptide-methionine-(S)-S-oxide reductase activity</b>              |
| -1.1                   | 8.26E-01 | 4.13           | 8.21E-05 | 3.88          | 1.31E-04 | 77899      | <b>ER-Golgi vesicle-tethering protein p115</b>                                                                   |
| 1.51                   | 3.64E-01 | 4.02           | 6.12E-03 | 6.09          | 8.16E-04 | 232651     | <b>Molecular chaperone (small heat-shock protein Hsp26/Hsp42)</b>                                                |
| -1.1                   | 5.27E-01 | 3.91           | 2.31E-06 | 3.45          | 7.76E-06 | 65863      | <b>Lipid phosphate phosphatase and related enzymes of the PAP2 family</b>                                        |
| -1.1                   | 7.14E-01 | 3.67           | 1.05E-04 | 3.34          | 2.29E-04 | 76560      | <b>Pyruvate decarboxylase. Thiamine pyrophosphate-requiring enzyme</b>                                           |
| 1.06                   | 8.79E-01 | 3.55           | 6.04E-03 | 3.78          | 4.33E-03 | 107249     | <b>Cyclin-dependent kinase inhibitor</b>                                                                         |
| -1.3                   | 4.43E-01 | 37.97          | 1.76E-09 | 29.68         | 5.04E-09 | 106884     | merzoite surface protein 1 [ <i>Plasmodium reichenowi</i> ]                                                      |
| 1.18                   | 7.75E-01 | 27.36          | 2.53E-05 | 32.36         | 1.42E-05 | 107796     | F-box domain containing protein [ <i>Metarhizium acridum</i> CQMa 102]                                           |
| -1.1                   | 8.99E-01 | 15.15          | 1.41E-03 | 13.82         | 1.87E-03 | 258882     | hypothetical protein                                                                                             |
| 1.26                   | 8.15E-01 | 9.29           | 3.65E-02 | 11.74         | 2.26E-02 | 237713     | zinc finger. C2H2 type family protein [ <i>Zea mays</i> ]                                                        |
| -1.5                   | 5.79E-01 | 9.23           | 6.52E-03 | 6.16          | 2.14E-02 | 113651     | RNA polymerase sigma-54 factor [ <i>Serratia odorifera</i> 4Rx13]                                                |
| -1.1                   | 8.70E-01 | 8.47           | 4.25E-06 | 8.03          | 5.82E-06 | 112805     | other/FunK1 protein kinase [ <i>Coprinopsis cinerea okayama</i> 7#130]                                           |
| -1.6                   | 4.10E-01 | 7.73           | 1.56E-03 | 4.88          | 9.61E-03 | 54123      | Ribonuclease P 40kDa (Rpp40) subunit superfamily [pfam08584]                                                     |
| 1                      | 1.00E+00 | 5.94           | 2.84E-05 | 5.94          | 2.84E-05 | 109821     | alpha/beta hydrolase. putative [ <i>Neosartorya fischeri</i> NRRL 181]                                           |
| <b>REPRESSED GENES</b> |          |                |          |               |          |            |                                                                                                                  |
| 1.47                   | 8.10E-02 | -603           | 2.28E-16 | -411.4        | 6.36E-16 | 255314     | <b>Bifunctional leukotriene A4 hydrolase/aminopeptidase LTA4H. Peptidase M1. membrane alanine aminopeptidase</b> |
| 1.17                   | 6.04E-01 | -503           | 1.30E-13 | -430.3        | 1.97E-13 | 84513      | <b>Mitochondrial inner membrane protein (mitofilin)</b>                                                          |
| -1.4                   | 2.90E-01 | -379           | 2.44E-12 | -546.6        | 9.27E-13 | 84546      | <b>Asparagine synthase (glutamine-hydrolyzing)</b>                                                               |
| -1.3                   | 5.54E-01 | -330           | 3.97E-10 | -433.6        | 1.94E-10 | 84467      | <b>Galactose-1-phosphate uridylyltransferase</b>                                                                 |
| 1.16                   | 7.44E-01 | -204           | 1.56E-09 | -175.6        | 2.41E-09 | 80706      | <b>Predicted carbohydrate kinase. contains PfkB domain</b>                                                       |
| 1.53                   | 4.01E-01 | -106           | 3.35E-08 | -69.4         | 1.29E-07 | 81279      | <b>Nucleoside diphosphate-sugar hydrolase of the MutT (NUDIX) family</b>                                         |

|      |          |       |          |        |          |        |                                                                                                                  |
|------|----------|-------|----------|--------|----------|--------|------------------------------------------------------------------------------------------------------------------|
| -1.4 | 2.53E-01 | -88.9 | 2.60E-11 | -126   | 7.91E-12 | 233954 | KEKE-like motif-containing transcription regulator (Rlr1)/suppressor of sin4                                     |
| -1.3 | 8.20E-01 | -52.4 | 1.50E-03 | -66.78 | 9.12E-04 | 256033 | Cyclin                                                                                                           |
| 1.18 | 7.18E-01 | -51.9 | 1.36E-07 | -43.85 | 2.48E-07 | 109113 | Histone acetyltransferase SAGA/ADA. catalytic subunit PCAF/GCN5 and related proteins. Zn-finger-like. PHD finger |
| 1.6  | 9.12E-02 | -49.4 | 3.50E-11 | -30.94 | 2.58E-10 | 63938  | Nucleosome remodeling factor. subunit CAF1/NURF55/MSI1. G-protein beta WD-40 repeat                              |
| 1.29 | 5.84E-01 | -47.3 | 2.00E-07 | -36.55 | 5.12E-07 | 103679 | Glucan 1.4-alpha-glucosidase                                                                                     |
| -1.1 | 8.76E-01 | -36.5 | 5.04E-04 | -41.65 | 3.59E-04 | 51157  | Nuclear exosomal RNA helicase MTR4. DEAD-box superfamily                                                         |
| 1.02 | 9.80E-01 | -34.7 | 1.88E-03 | -33.9  | 1.99E-03 | 34765  | RNA polymerase II transcriptional regulation mediator. MED6 mediator                                             |
| -1.1 | 6.98E-01 | -31.7 | 4.25E-09 | -35.96 | 2.50E-09 | 103636 | Tuftelin-interacting protein TIP39. contains G-patch domain. Zn-finger. C2H2 type                                |
| -1.1 | 8.70E-01 | -31.3 | 9.29E-09 | -33.06 | 7.35E-09 | 50648  | Isoamyl acetate-hydrolyzing esterase. Lipolytic enzyme. G-D-S-L                                                  |
| 1.42 | 4.41E-01 | -28.9 | 8.43E-07 | -20.31 | 3.52E-06 | 70633  | RNA helicase. DEAD/DEAH box helicase. N-terminal                                                                 |
| 1.07 | 7.88E-01 | -18   | 5.76E-10 | -16.9  | 8.09E-10 | 65761  | Glucosidase I                                                                                                    |
| 1.39 | 1.62E-01 | -16.8 | 5.05E-10 | -12.09 | 3.29E-09 | 64183  | Biotin synthase. Radical SAM                                                                                     |
| -1.2 | 8.22E-01 | -14.9 | 5.28E-04 | -17.22 | 3.24E-04 | 16640  | Alcohol dehydrogenase. class V                                                                                   |
| 1.23 | 7.55E-01 | -10.3 | 2.20E-03 | -8.4   | 4.36E-03 | 47592  | Vigilin. KH. type 1. RNA binding                                                                                 |
| 1.31 | 2.76E-01 | -8.57 | 9.21E-08 | -6.52  | 5.97E-07 | 110853 | Glucan endo-1.3-alpha-glucosidase                                                                                |
| -1   | 9.19E-01 | -7.95 | 2.02E-07 | -8.16  | 1.70E-07 | 50254  | Metalloexopeptidases. G-protein beta WD-40 repeat                                                                |
| 1.08 | 7.12E-01 | -7.54 | 1.32E-08 | -6.99  | 2.29E-08 | 47747  | Inositol monophosphatase                                                                                         |
| -1.5 | 6.00E-01 | -7.45 | 1.40E-02 | -11.02 | 4.49E-03 | 14418  | Phospholipid/glycerol acyltransferase                                                                            |
| 1.18 | 7.06E-01 | -7.25 | 2.72E-04 | -6.14  | 6.18E-04 | 81374  | FUN14                                                                                                            |
| -1   | 9.28E-01 | -7.13 | 7.32E-04 | -7.44  | 6.01E-04 | 13226  | 6-phosphogluconate dehydrogenase                                                                                 |
| 1.21 | 7.88E-01 | -6.79 | 1.29E-02 | -5.63  | 2.28E-02 | 38732  | mRNA capping enzyme. guanylyltransferase (alpha) subunit                                                         |
| -1   | 9.00E-01 | -6.75 | 1.54E-05 | -7.03  | 1.20E-05 | 256186 | DHHC-type Zn-finger proteins                                                                                     |
| 1.9  | 1.95E-01 | -6.66 | 9.71E-04 | -3.5   | 1.75E-02 | 85448  | Cellular protein (glioma tumor suppressor candidate region gene 2)                                               |
| 1.15 | 6.50E-01 | -5.98 | 1.42E-05 | -5.21  | 3.56E-05 | 47635  | Serine/threonine protein phosphatase                                                                             |
| -1.7 | 1.84E-01 | -5.53 | 2.62E-04 | -9.26  | 1.53E-05 | 81303  | Proteins containing regions of low-complexity                                                                    |
| 1.18 | 6.05E-01 | -5.32 | 4.68E-05 | -4.52  | 1.39E-04 | 62043  | RNA polymerase II holoenzyme and mediator subcomplex. subunit SURB7/SRB7                                         |
| 1.24 | 4.20E-01 | -5.22 | 6.72E-06 | -4.22  | 3.42E-05 | 13366  | Succinyl-CoA synthetase. alpha subunit. Citrate cycle                                                            |
| 1.2  | 3.71E-01 | -5.11 | 2.91E-07 | -4.25  | 1.44E-06 | 65904  | Serine carboxypeptidases                                                                                         |
| 1.1  | 8.76E-01 | -4.9  | 1.82E-02 | -4.45  | 2.51E-02 | 51977  | Translation initiation factor 2B. beta subunit (eIF-2Bbeta/GCD7)                                                 |
| -1.1 | 6.10E-01 | -4.67 | 4.33E-06 | -5.27  | 1.66E-06 | 64009  | Dopey and related predicted leucine zipper transcription factors                                                 |
| 1.19 | 6.02E-01 | -4.61 | 2.24E-04 | -3.87  | 7.01E-04 | 108333 | Ran-binding protein RANBP1 and related RanBD domain proteins                                                     |
| 1.15 | 5.93E-01 | -4.5  | 2.57E-05 | -3.9   | 7.80E-05 | 81380  | Phosphatidylinositol synthase                                                                                    |
| 1.34 | 2.45E-01 | -4.24 | 1.43E-05 | -3.17  | 1.66E-04 | 256079 | Regulator of chromosome condensation. RCC1                                                                       |
| -1.1 | 6.68E-01 | -4.22 | 2.08E-04 | -4.82  | 8.33E-05 | 60330  | Alpha-mannosidase                                                                                                |
| -1.3 | 6.70E-01 | -4.13 | 2.36E-02 | -5.3   | 9.57E-03 | 16984  | Mitochondrial tryptophanyl-tRNA synthetase                                                                       |
| -1   | 8.68E-01 | -4.09 | 2.70E-07 | -4.21  | 2.04E-07 | 84499  | beta-1.6-N-acetylglucosaminyltransferase. contains WSC domain                                                    |
| -1.3 | 4.17E-01 | -4.01 | 3.66E-04 | -5.2   | 6.36E-05 | 255409 | Phosphoglucomutase/phosphomannomutase                                                                            |
| -1   | 9.16E-01 | -3.91 | 1.25E-04 | -4.02  | 1.00E-04 | 50708  | Very-long-chain acyl-CoA dehydrogenase. Cytochrome b5                                                            |
| 1    | 9.93E-01 | -3.85 | 2.52E-07 | -3.85  | 2.56E-07 | 74357  | Folylpolyglutamate synthase. Folate biosynthesis                                                                 |
| -1.1 | 9.01E-01 | -3.73 | 1.09E-02 | -3.95  | 8.34E-03 | 109000 | Zn-finger. C2H2 type                                                                                             |
| -1.2 | 7.27E-01 | -3.7  | 4.60E-03 | -4.27  | 2.13E-03 | 232775 | WASP-interacting protein VRP1/WIP. contains WH2 domain. DNA-binding SAP                                          |
| -1.1 | 8.82E-01 | -3.64 | 3.94E-02 | -3.97  | 2.91E-02 | 84485  | DNA polymerase delta. regulatory subunit 55                                                                      |
| -1   | 8.83E-01 | -3.58 | 1.69E-05 | -3.7   | 1.26E-05 | 14523  | Leptin receptor gene-related protein. Vacuolar protein sorting 55                                                |
| -1.2 | 3.80E-01 | -3.38 | 1.99E-05 | -4.08  | 3.51E-06 | 84101  | Antifreeze protein. type I. C-type lectin                                                                        |
| -1.2 | 5.26E-01 | -3.04 | 1.13E-04 | -3.52  | 3.01E-05 | 72933  | Mitochondrial import inner membrane translocase. subunit TIM22                                                   |
| -1   | 9.30E-01 | -44.4 | 8.05E-11 | -45.51 | 7.30E-11 | 13289  | PcbC . Isopenicillin N synthase and related dioxygenases [COG3491]                                               |

|      |          |       |          |        |          |        |                                                                                        |
|------|----------|-------|----------|--------|----------|--------|----------------------------------------------------------------------------------------|
| 1.58 | 1.35E-01 | -32.3 | 1.19E-09 | -20.42 | 9.92E-09 | 105675 | predicted: collagen alpha-1(XXVII) chain-like [ <i>Monodelphis domestica</i> ]         |
| -1.3 | 5.95E-01 | -24.3 | 7.13E-06 | -31.85 | 2.57E-06 | 48548  | integral inner nuclear membrane protein lma1 [ <i>Schizosaccharomyces pombe</i> 972h-] |
| 1    | 9.94E-01 | -23.6 | 1.74E-08 | -23.5  | 1.76E-08 | 86060  | replicase [Potato virus X]                                                             |
| -1.4 | 6.36E-01 | -21.2 | 1.96E-04 | -28.96 | 7.14E-05 | 110865 | oxidoreductase [ <i>Lactococcus garvieae</i> ATCC 49156]                               |
| -1.3 | 6.69E-01 | -20.6 | 4.86E-05 | -26.31 | 2.02E-05 | 84126  | hypothetical protein                                                                   |
| 1.82 | 2.81E-01 | -20.3 | 3.17E-05 | -11.18 | 3.21E-04 | 103131 | succinate-CoA ligase (GDP-forming) [ <i>Dictyostelium purpureum</i> ]                  |
| -1.5 | 2.08E-01 | -14.8 | 1.05E-07 | -22.1  | 1.43E-08 | 81356  | hamartin [ <i>Schizosaccharomyces japonicus</i> yFS275]                                |
| 1.63 | 2.94E-01 | -13   | 2.76E-05 | -7.98  | 2.60E-04 | 10509  | erythronolide synthase [ <i>Shewanella sediminis</i> HAW-EB3]                          |
| 1.52 | 5.97E-02 | -12.7 | 7.68E-10 | -8.33  | 1.15E-08 | 81382  | ExoD [ <i>Cellvibrio japonicus</i> Ueda107]                                            |
| 1.53 | 5.89E-01 | -10   | 8.09E-03 | -6.56  | 2.56E-02 | 231110 | putative long-chain-fatty-acid--CoA ligase [ <i>Sinorhizobium fredii</i> NGR234]       |
| 1.16 | 5.16E-01 | -9.28 | 2.40E-08 | -7.97  | 6.61E-08 | 105839 | F-box-like [pfam12937]                                                                 |
| 1.07 | 8.34E-01 | -5.82 | 3.03E-05 | -5.45  | 4.67E-05 | 103413 | oligopeptide ABC transporter permease [ <i>Methanosarcina barkeri</i> str. Fusaro]     |
| -1.1 | 8.01E-01 | -5.67 | 3.76E-04 | -6.26  | 2.18E-04 | 13288  | DUF2413 domain. Pc16g07860 [ <i>Penicillium chrysogenum</i> Wisconsin 54-1255]         |
| -1.3 | 6.41E-01 | -5.59 | 1.07E-02 | -7.43  | 3.86E-03 | 103965 | predicted: GRAM domain-containing protein 4-like [ <i>Oreochromis niloticus</i> ]      |
| 1.16 | 6.34E-01 | -4.9  | 6.52E-05 | -4.23  | 1.79E-04 | 105630 | hypothetical protein                                                                   |
| 1.43 | 2.80E-01 | -4.38 | 2.70E-04 | -3.06  | 3.00E-03 | 110215 | hypothetical protein                                                                   |
| -1   | 9.50E-01 | -3.97 | 7.49E-03 | -4.09  | 6.53E-03 | 16995  | LETM1 [pfam07766]. LETM1-like protein; inner mitochondrial membrane proteins           |
| -1.6 | 5.02E-02 | -3.39 | 7.37E-05 | -5.57  | 1.26E-06 | 72748  | DUF2404 [pfam10296]. putative integral membrane protein conserved region               |

**Table S6:** Blastp results of "unknown function" of exclusively regulated genes in Ras1 mutant. n.a. – not available

| Protein ID             | putative function                                                                      | Accession No   | Coverage / EValue |
|------------------------|----------------------------------------------------------------------------------------|----------------|-------------------|
| <b>INDUCED GENES</b>   |                                                                                        |                |                   |
| 106884                 | merozoite surface protein 1 [ <i>Plasmodium reichenowi</i> ]                           | CAH10285.1     | 33% / 0.011       |
| 107796                 | F-box domain containing protein [ <i>Metarhizium acridum</i> CQMa 102]                 | EFY85273.1     | 82% / 0.001       |
| 258882                 | hypothetical protein                                                                   |                |                   |
| 237713                 | zinc finger, C2H2 type family protein [ <i>Zea mays</i> ]                              | NP_001152939.1 | 7% / 8.5          |
| 113651                 | RNA polymerase sigma-54 factor [ <i>Serratia odorifera</i> 4Rx13]                      | ZP_06191518.1  | 10% / 3.5         |
| 112805                 | other/FunK1 protein kinase [ <i>Coprinopsis cinerea</i> okayama7#130]                  | XP_001835156.2 | 78% / 1e-15       |
| 54123                  | Ribonuclease P 40kDa (Rpp40) subunit superfamily [pfam08584]                           |                | 2.66e-15          |
| 109821                 | alpha/beta hydrolase. putative [ <i>Neosartorya fischeri</i> NRRL 181]                 | XP_001258274.1 | 66% / 3e-12       |
| <b>REPRESSED GENES</b> |                                                                                        |                |                   |
| 13289                  | PcbC . Isopenicillin N synthase and related dioxygenases [COG3491]                     | n.a.           | 1.33e-12          |
| 105675                 | predicted: collagen alpha-1(XXVII) chain-like [ <i>Monodelphis domestica</i> ]         | XP_003339678.1 | 40% / 3.7         |
| 48548                  | integral inner nuclear membrane protein lma1 [ <i>Schizosaccharomyces pombe</i> 972h-] | NP_588365.1    | 58% / 4e-19       |
| 86060                  | replicase [Potato virus X]                                                             | CAD33246.1     | 78% / 0.36        |
| 110865                 | oxidoreductase [ <i>Lactococcus garvieae</i> ATCC 49156]                               | YP_004779881.1 | 51% / 7.3         |
| 84126                  | hypothetical protein                                                                   |                |                   |
| 103131                 | succinate-CoA ligase (GDP-forming) [ <i>Dictyostelium purpureum</i> ]                  | XP_003291936.1 | 80% / 6.8         |
| 81356                  | hamartin [ <i>Schizosaccharomyces japonicus</i> yFS275]                                | XP_002172257.1 | 79% / 6e-23       |
| 10509                  | erythronolide synthase [ <i>Shewanella sediminis</i> HAW-EB3]                          | YP_001474934.1 | 64% / 0.33        |
| 81382                  | ExoD [ <i>Cellvibrio japonicus</i> Ueda107]                                            | YP_001983993.1 | 43% / 0.49        |
| 231110                 | putative long-chain-fatty-acid--CoA ligase [ <i>Sinorhizobium fredii</i> NGR234]       | YP_002825453.1 | 31% / 1.8         |
| 105839                 | F-box-like [pfam12937]                                                                 | n.a.           | 7.31e-03          |

|        |                                                                                    |                |             |
|--------|------------------------------------------------------------------------------------|----------------|-------------|
| 103413 | oligopeptide ABC transporter permease [ <i>Methanosarcina barkeri</i> str. Fusaro] | YP_307118.1    | 72% / 0.42  |
| 13288  | DUF2413 domain. Pc16g07860 [ <i>Penicillium chrysogenum</i> Wisconsin 54-1255]     | XP_002561108.1 | 84% / 1e-25 |
| 103965 | predicted: GRAM domain-containing protein 4-like [ <i>Oreochromis niloticus</i> ]  | XP_003445122.1 | 19% / 1e-04 |
| 105630 | hypothetical protein                                                               | n.a.           | n.a.        |
| 110215 | hypothetical protein                                                               | n.a.           | n.a.        |
| 16995  | LETM1 [pfam07766]. LETM1-like protein; inner mitochondrial membrane proteins       | n.a.           | 9.35e-11    |
| 72748  | DUF2404 [pfam10296]. putative integral membrane protein conserved region           | n.a.           | 3.72e-33    |

**Table S7:** Differentially expressed genes in  $\Delta$ Gap1 mutant. Fold = fold change. Putative function indicates annotation of genome. Genes with unknown function are written as last genes. The effected genes are not regulated in the other mutant strains. Febit-ID includes protein ID in the middle.

| 12-43 vs. 4-39       |        | $\Delta$ Gap1 x $\Delta$ Gap1 vs. W22 x 12-43 |         | febit-ID      | putative function                                                                             |
|----------------------|--------|-----------------------------------------------|---------|---------------|-----------------------------------------------------------------------------------------------|
| Fold                 | pValue | Fold                                          | pValue  |               |                                                                                               |
| <b>INDUCED GENES</b> |        |                                               |         |               |                                                                                               |
| -1.3                 | 0.785  | 15.89                                         | 0.00485 | 295-102318-PM | Aminoacyl-tRNA synthetase. class I                                                            |
| -1.3                 | 0.753  | 13.07                                         | 0.00908 | 124-256320-PM | Transcription regulator XNP/ATRX. DEAD-box superfamily. Shugoshin. N terminal                 |
| -1.1                 | 0.883  | 12.67                                         | 0.00716 | 171-42694-PM  | Pseudouridylate synthase                                                                      |
| 1.21                 | 0.822  | 11.54                                         | 0.0083  | 196-45628-PM  | HMG-box transcription factor. Helix-turn-helix. Fis-type                                      |
| -1.2                 | 0.805  | 10.98                                         | 0.0125  | 115-80616-PM  | Spindle pole body protein - Sad1p. Peptidase C19. ubiquitin carboxyl-terminal hydrolase 2     |
| -1                   | 0.976  | 10.6                                          | 0.00893 | 126-235815-PM | Predicted steroid reductase                                                                   |
| -1.6                 | 0.629  | 9.5                                           | 0.0384  | 170-109412-PM | AAA+-type ATPase                                                                              |
| 1.23                 | 0.801  | 8.65                                          | 0.0181  | 56-51001-PM   | Nucleolar GTPase/ATPase p130                                                                  |
| -1.2                 | 0.834  | 8.58                                          | 0.047   | 85-69766-PM   | 3-phosphoinositide-dependent protein kinase (PKD). Protein kinase                             |
| -1                   | 0.981  | 8.38                                          | 0.0232  | 107-108327-PM | Rab GTPase activator activity                                                                 |
| -1.2                 | 0.798  | 8.34                                          | 0.00658 | 55-257431-PM  | Chitinase. N-Glycan degradation. Sphingoglycolipid metabolism. Exo-alpha-sialidase            |
| -1.1                 | 0.897  | 7.9                                           | 0.0191  | 129-84176-PM  | Myosin assembly protein/sexual cycle protein and related proteins                             |
| -1.2                 | 0.85   | 7.35                                          | 0.02    | 69-53882-PM   | Flavonol reductase/cinnamoyl-CoA reductase. Cinnamyl-alcohol dehydrogenase                    |
| 1.31                 | 0.721  | 7.24                                          | 0.0158  | 153-61334-PM  | Glucose dehydrogenase/choline dehydrogenase/mandelonitrile lyase (GMC oxidoreductase family)  |
| -1.6                 | 0.489  | 7.15                                          | 0.0053  | 224-114530-PM | Zn-finger. C2H2 type                                                                          |
| -1.4                 | 0.53   | 6.99                                          | 0.00093 | 63-61055-PM   | Tannase and feruloyl esterase                                                                 |
| 1.54                 | 0.591  | 6.35                                          | 0.0313  | 171-58751-PM  | Nuclear AAA ATPase (VCP subfamily). Peptidase S16. Ion protease                               |
| -1.1                 | 0.865  | 5.83                                          | 0.0195  | 93-15362-PM   | G-protein beta WD40 repeat-containing protein. 2-acetyl-1-alkylglycerophosphocholine esterase |
| 1.03                 | 0.967  | 5.26                                          | 0.0433  | 57-113856-PM  | Serine/threonine protein kinase                                                               |
| -1.3                 | 0.302  | 5.23                                          | 1.1E-06 | 58-109925-PM  | protein kinase activity                                                                       |
| -1                   | 0.96   | 5.12                                          | 0.0316  | 235-231200-PM | Zn-finger. MYND type                                                                          |
| -1.3                 | 0.262  | 4.98                                          | 5.6E-06 | 54-112724-PM  | Cyclin-like F-box                                                                             |
| -1.8                 | 0.386  | 4.96                                          | 0.0207  | 283-57845-PM  | Short-chain dehydrogenase/reductase SDR. Predicted integral membrane protein                  |
| -1                   | 0.938  | 4.72                                          | 0.00708 | 105-84518-PM  | Histone H1                                                                                    |
| 1.27                 | 0.535  | 4.7                                           | 0.00085 | 68-110288-PM  | R-Golgi vesicle-tethering protein p115                                                        |

|      |        |       |         |               |                                                                                                                                   |
|------|--------|-------|---------|---------------|-----------------------------------------------------------------------------------------------------------------------------------|
| -1.2 | 0.808  | 4.64  | 0.0393  | 57-256713-PM  | GATA-4/5/6 transcription factors                                                                                                  |
| -1.6 | 0.301  | 4.41  | 0.00434 | 102-49013-PM  | Ornithine aminotransferase                                                                                                        |
| -1   | 0.917  | 4.35  | 4.8E-06 | 78-231712-PM  | Cyclin-dependent kinase WEE1. protein kinase activity                                                                             |
| -1.3 | 0.644  | 4.29  | 0.0133  | 99-65844-PM   | Molecular chaperones HSP70/HSC70. HSP70 superfamily                                                                               |
| -2   | 0.0394 | 4.13  | 0.00023 | 316-59130-PM  | Amidohydrolase-like                                                                                                               |
| 1.53 | 0.4    | 4.08  | 0.0109  | 107-232771-PM | Transcription regulator XNP/ATRX. DEAD-box superfamily. Cytochrome c heme-binding site                                            |
| -1.1 | 0.884  | 4.05  | 0.0101  | 75-106125-PM  | Cyclin-like F-box                                                                                                                 |
| -1.2 | 0.524  | 3.9   | 0.00028 | 62-76871-PM   | Cytochrome P450. Unspecific monooxygenase                                                                                         |
| -1.5 | 0.512  | 3.7   | 0.0317  | 62-50580-PM   | Signal recognition particle receptor. beta subunit (small G protein superfamily). GTP1/OBG                                        |
| -1.2 | 0.719  | 3.61  | 0.0139  | 356-107962-PM | Bestrophin                                                                                                                        |
| -1.4 | 0.248  | 3.58  | 0.0004  | 67-71133-PM   | Meltrins. fertilins and related Zn-dependent metalloproteinases of the ADAMs family. Disintegrin. Peptidase M12B. ADAM/reprolysin |
| 1.93 | 0.0663 | 3.5   | 0.00163 | 129-238097-PM | hydrolase activity. hydrolyzing O-glycosyl compounds. carbohydrate metabolic process. Glycoside hydrolase. family 10              |
| -1.1 | 0.737  | 3.46  | 0.00028 | 348-55177-PM  | Predicted transporter (major facilitator superfamily)                                                                             |
| 1.29 | 0.445  | 3.43  | 0.0016  | 57-82890-PM   | hydrolase activity. hydrolyzing O-glycosyl compounds. carbohydrate metabolic process. Glycoside hydrolase. family 7               |
| 1.19 | 0.66   | 3.39  | 0.00554 | 288-103992-PM | Myosin class II heavy chain                                                                                                       |
| 1.55 | 0.402  | 3.34  | 0.0312  | 67-77659-PM   | DNA repair protein RAD50. ABC-type ATPase/SMC superfamily                                                                         |
| -1   | 0.984  | 3.25  | 0.00735 | 56-77406-PM   | TFIIF-interacting CTD phosphatase. including NLI-interacting factor (involved in RNA polymerase II regulation)                    |
| -1.3 | 0.42   | 3.06  | 0.00312 | 58-256692-PM  | Myosin class II heavy chain. Lipocalin-related protein and Bos/Can/Equ allergen                                                   |
| 1.25 | 0.42   | 3.06  | 0.00079 | 55-84301-PM   | PPR repeat                                                                                                                        |
| 1.28 | 0.552  | 3     | 0.0154  | 128-58593-PM  | Glucose-repressible alcohol dehydrogenase transcriptional effector CCR4 and related proteins                                      |
| 1.52 | 0.751  | 121.5 | 0.0018  | 219-61757-PM  | <i>unknown</i>                                                                                                                    |
| -1.5 | 0.668  | 49.12 | 0.00048 | 146-79246-PM  | <i>unknown</i>                                                                                                                    |
| -1.1 | 0.875  | 35.6  | 0.00021 | 53-57001-PM   | <i>unknown</i>                                                                                                                    |
| 1.38 | 0.777  | 25.93 | 0.0101  | 293-113076-PM | <i>unknown</i>                                                                                                                    |
| -1.7 | 0.407  | 23.09 | 7.4E-05 | 111-42141-PM  | <i>unknown</i>                                                                                                                    |
| -1.2 | 0.865  | 20.2  | 0.00505 | 118-106931-PM | <i>unknown</i>                                                                                                                    |
| 1.64 | 0.624  | 20.02 | 0.00741 | 154-235734-PM | <i>unknown</i>                                                                                                                    |
| 1.17 | 0.865  | 17.61 | 0.00635 | 122-230333-PM | <i>unknown</i>                                                                                                                    |
| -1.3 | 0.771  | 12.73 | 0.00493 | 102-69462-PM  | <i>Protein of unknown function DUF663</i>                                                                                         |
| -1.1 | 0.913  | 12.49 | 0.0036  | 104-231961-PM | <i>unknown</i>                                                                                                                    |
| -1.1 | 0.872  | 12.44 | 0.0066  | 178-43113-PM  | <i>unknown</i>                                                                                                                    |
| 1.18 | 0.787  | 11.5  | 0.00082 | 236-106104-PM | <i>unknown</i>                                                                                                                    |
| -1.4 | 0.655  | 10.65 | 0.00521 | 155-112763-PM | <i>unknown</i>                                                                                                                    |
| -1.4 | 0.729  | 10.34 | 0.0287  | 121-57287-PM  | <i>unknown</i>                                                                                                                    |
| -1.5 | 0.701  | 8.85  | 0.0367  | 314-106297-PM | <i>unknown</i>                                                                                                                    |
| -1   | 0.998  | 8.71  | 0.00746 | 135-112849-PM | <i>unknown</i>                                                                                                                    |
| -1.9 | 0.464  | 7.73  | 0.026   | 215-237461-PM | <i>unknown</i>                                                                                                                    |
| -1.3 | 0.32   | 7.51  | 6.2E-07 | 63-85715-PM   | <i>Uncharacterized conserved protein (tumor-rejection antigen MAGE in humans)</i>                                                 |
| 1.03 | 0.966  | 7.45  | 0.00311 | 78-236440-PM  | <i>unknown</i>                                                                                                                    |
| -1.4 | 0.687  | 6.93  | 0.0234  | 357-112020-PM | <i>Uncharacterized conserved protein BCNT</i>                                                                                     |
| 1.1  | 0.897  | 6.63  | 0.0199  | 402-108687-PM | <i>Uncharacterized conserved coiled-coil protein</i>                                                                              |
| -1.1 | 0.929  | 6.45  | 0.00151 | 61-61583-PM   | <i>unknown</i>                                                                                                                    |
| -1.3 | 0.576  | 6.22  | 0.00058 | 65-107045-PM  | <i>unknown</i>                                                                                                                    |
| -1.7 | 0.507  | 5.16  | 0.0393  | 203-236276-PM | <i>unknown</i>                                                                                                                    |
| 1.06 | 0.894  | 4.81  | 0.00316 | 130-78007-PM  | <i>unknown</i>                                                                                                                    |
| 1.41 | 0.243  | 4.24  | 8.6E-05 | 74-78760-PM   | <i>unknown</i>                                                                                                                    |
| 1.22 | 0.711  | 4.12  | 0.0175  | 85-59277-PM   | <i>Protein of unknown function DUF1253</i>                                                                                        |

|                        |        |         |         |               |                                                                                                                        |
|------------------------|--------|---------|---------|---------------|------------------------------------------------------------------------------------------------------------------------|
| -1.5                   | 0.125  | 4.07    | 6.9E-05 | 67-258043-PM  | <i>unknown</i>                                                                                                         |
| 1.46                   | 0.408  | 3.91    | 0.00692 | 79-12191-PM   | <i>unknown</i>                                                                                                         |
| -1.3                   | 0.597  | 3.86    | 0.0228  | 53-234757-PM  | <i>unknown</i>                                                                                                         |
| -1.1                   | 0.807  | 3.65    | 5.3E-05 | 61-85535-PM   | <i>unknown</i>                                                                                                         |
| 1.07                   | 0.91   | 3.59    | 0.0366  | 65-111352-PM  | <i>unknown</i>                                                                                                         |
| -1.7                   | 0.238  | 3.39    | 0.00931 | 148-71969-PM  | <i>unknown</i>                                                                                                         |
| -1.4                   | 0.392  | 3.12    | 0.00904 | 339-32474-PM  | <i>unknown</i>                                                                                                         |
| 1.43                   | 0.337  | 3.11    | 0.00622 | 74-85346-PM   | <i>unknown</i>                                                                                                         |
| <b>REPRESSED GENES</b> |        |         |         |               |                                                                                                                        |
| 1.28                   | 0.713  | -165.93 | 5.1E-07 | 103-79176-PM  | Vesicle coat complex COPII. subunit SEC23. Gelsolin regio                                                              |
| -1.31                  | 0.296  | -124.48 | 6.1E-13 | 113-86056-PM  | Ubiquitin and ubiquitin-like proteins                                                                                  |
| -1.09                  | 0.877  | -55.81  | 2.1E-06 | 153-17256-PM  | Transferrin receptor and related proteins containing the protease-associated (PA) domain. Peptidase M28                |
| 1.86                   | 0.466  | -55.18  | 0.00017 | 149-39575-PM  | dUTPase                                                                                                                |
| 1.1                    | 0.88   | -45.02  | 1.9E-05 | 123-15875-PM  | Predicted gamma-butyrobetaine.2-oxoglutarate dioxygenase. Trimethyllysine dioxygenase.                                 |
| -1.59                  | 0.622  | -41.14  | 0.00086 | 105-14451-PM  | Glia maturation factor beta. Actin-binding. cofilin/tropomyosin type                                                   |
| -1.55                  | 0.47   | -18.01  | 0.00016 | 59-109225-PM  | NADH-ubiquinone oxidoreductase. subunit NDUFB10/PDSW                                                                   |
| -1.43                  | 0.637  | -12.29  | 0.00381 | 141-60009-PM  | Protein of unknown function UPF0203                                                                                    |
| -1.16                  | 0.814  | -11.58  | 0.00092 | 70-46796-PM   | Myosin regulatory light chain. EF-Hand protein superfamily. Calcium-binding EF-hand                                    |
| 1.31                   | 0.701  | -10.68  | 0.00317 | 63-48018-PM   | Histidinol-phosphatase                                                                                                 |
| 1.89                   | 0.0261 | -7.43   | 6.5E-07 | 175-231351-PM | beta-1.6-N-acetylglucosaminyltransferase. contains WSC domain                                                          |
| 1.16                   | 0.715  | -7.18   | 0.00016 | 53-109359-PM  | Non-ribosomal peptide synthetase/alpha-aminoadipate reductase and related enzymes. AMP-dependent synthetase and ligase |
| -1.2                   | 0.84   | -6.93   | 0.0465  | 150-17184-PM  | Lipase. class 3                                                                                                        |
| -1.05                  | 0.943  | -6.19   | 0.0119  | 69-77743-PM   | Permease of the major facilitator superfamily                                                                          |
| 1.29                   | 0.542  | -6.14   | 0.00033 | 178-71465-PM  | Sexual differentiation process protein ISP4. Oligopeptide transporter OPT superfamily                                  |
| -1.26                  | 0.671  | -5.5    | 0.00585 | 68-14103-PM   | Transport protein particle (TRAPP) complex subunit                                                                     |
| 1.13                   | 0.812  | -5.45   | 0.00416 | 120-31488-PM  | SLT                                                                                                                    |
| -1.5                   | 0.183  | -5.14   | 2.9E-05 | 60-68724-PM   | 60s ribosomal protein L34                                                                                              |
| 1.23                   | 0.437  | -4.72   | 1.3E-05 | 57-105121-PM  | Fungal hydrophobin. beta-1.6-N-acetylglucosaminyltransferase. contains WSC domain                                      |
| 1.02                   | 0.929  | -4.3    | 1.5E-06 | 127-61170-PM  | oxidoreductase activity. FAD linked oxidase. N-terminal                                                                |
| -1.23                  | 0.7    | -4.24   | 0.0146  | 100-79125-PM  | Short-chain dehydrogenase/reductase SDR. 3-oxoacyl-[acyl-carrier protein] reductase.                                   |
| 1.7                    | 0.214  | -4.23   | 0.00261 | 80-113652-PM  | conserved protein. DSS1/SEM1                                                                                           |
| -1.1                   | 0.55   | -4.05   | 9.8E-08 | 106-64360-PM  | Ribosome biogenesis protein NIP7                                                                                       |
| -1.62                  | 0.109  | -3.47   | 0.00044 | 96-80323-PM   | Tripeptidyl-peptidase I. Peptidase S8 and S53. subtilisin. kexin. sedolisin                                            |
| 1.15                   | 0.531  | -3.46   | 2.7E-05 | 123-104099-PM | Glycine cleavage system H protein (lipoate-binding)                                                                    |
| 1.17                   | 0.547  | -3.42   | 0.00013 | 92-57671-PM   | 60s ribosomal protein L39                                                                                              |
| 1.26                   | 0.5    | -3.42   | 0.00214 | 182-235154-PM | Splicing coactivator SRm160/300. subunit SRm160 (contains PWI domain)                                                  |
| -1.12                  | 0.654  | -3.39   | 0.00012 | 71-231179-PM  | Pleiotropic drug resistance proteins (PDR1-15). ABC superfamily. ABC transporter                                       |
| -1.03                  | 0.943  | -3.33   | 0.00653 | 108-257346-PM | beta-1.6-N-acetylglucosaminyltransferase. contains WSC domain                                                          |
| -1.3                   | 0.543  | -3.3    | 0.0115  | 209-52896-PM  | Cobyrinic acid a.c.-diamide synthase                                                                                   |
| -1.16                  | 0.696  | -3.29   | 0.00536 | 95-235908-PM  | RNA-binding protein LARP/SRO9 and related La domain proteins                                                           |
| -1.01                  | 0.978  | -3.2    | 0.00586 | 68-9862-PM    | DNA-directed RNA polymerase. subunit RPB7.0                                                                            |
| -1.19                  | 0.737  | -3.11   | 0.0436  | 399-85953-PM  | Molecular chaperone Prefoldin. subunit 3                                                                               |
| -1.35                  | 0.219  | -3.09   | 0.00016 | 92-16727-PM   | Predicted haloacid-halidohydrolase and related hydrolases. Riboflavin kinase                                           |
| 1.14                   | 0.674  | -3.04   | 0.00248 | 55-84848-PM   | Haloacid dehalogenase/epoxide hydrolase                                                                                |
| -1.1                   | 0.884  | -111.71 | 2.1E-06 | 147-17490-PM  | <i>unknown</i>                                                                                                         |



|       |       |        |         |               |                                   |
|-------|-------|--------|---------|---------------|-----------------------------------|
| -1.46 | 0.316 | -14.74 | 1.1E-06 | 94-76730-PM   | unknown                           |
| -1.08 | 0.943 | -12.7  | 0.0339  | 101-107338-PM | unknown                           |
| 1.09  | 0.766 | -11.24 | 2.7E-07 | 53-104909-PM  | unknown                           |
| 1.47  | 0.73  | -11.19 | 0.0401  | 113-104625-PM | unknown                           |
| -1.2  | 0.464 | -10.94 | 2.4E-08 | 102-85227-PM  | unknown                           |
| -1.04 | 0.974 | -10.43 | 0.0459  | 101-54808-PM  | Uncharacterized conserved protein |
| 1.08  | 0.783 | -5.96  | 7.6E-06 | 53-255808-PM  | unknown                           |
| -1.39 | 0.611 | -4.9   | 0.0242  | 65-56668-PM   | unknown                           |
| 1.58  | 0.135 | -4.71  | 5.5E-05 | 83-109873-PM  | unknown                           |
| 1.6   | 0.144 | -4.7   | 0.0001  | 84-72462-PM   | unknown                           |
| -1.17 | 0.717 | -4.61  | 0.00254 | 119-102877-PM | unknown                           |
| 1.09  | 0.668 | -4.11  | 1.9E-06 | 73-85818-PM   | unknown                           |
| -1.12 | 0.643 | -3.64  | 5.4E-05 | 56-113207-PM  | unknown                           |
| 1.33  | 0.152 | -3.54  | 4.6E-06 | 84-103827-PM  | unknown                           |
| -1.57 | 0.141 | -3.54  | 0.00046 | 217-234366-PM | unknown                           |

**Table S8:** Differentially expressed genes in Cdc42 mutant. Fold = fold change. Putative function indicates annotation of genome, genes with unknown function are written as last genes. The effected genes are not regulated in the other mutant strains. Febit-ID includes protein ID in the middle.

| 12-43 vs. 4-39       |          | Cdc42 vs. 12-43 |          | Cdc42 vs. 4-39 |          | febit-ID      | putative function                                                                                           |
|----------------------|----------|-----------------|----------|----------------|----------|---------------|-------------------------------------------------------------------------------------------------------------|
| Fold                 | pValue   | Fold            | pValue   | Fold           | pValue   |               |                                                                                                             |
| <b>INDUCED GENES</b> |          |                 |          |                |          |               |                                                                                                             |
| -1.19                | 8.49E-01 | 102.6           | 9.50E-05 | 86.08          | 1.42E-04 | 131-13754-PM  | Riboflavin kinase                                                                                           |
| 1.53                 | 5.46E-01 | 29.62           | 1.30E-04 | 45.26          | 3.67E-05 | 437-257367-PM | Transcription regulator dachshund. contains SKI/SNO domain. microtubule-based process. N-Glycan degradation |
| -1.49                | 5.46E-01 | 15.58           | 5.78E-04 | 10.43          | 2.19E-03 | 331-47163-PM  | Tyrosyl-DNA phosphodiesterase                                                                               |
| 1.8                  | 1.93E-01 | 9.75            | 6.59E-05 | 17.54          | 4.55E-06 | 63-232539-PM  | C-type lectin                                                                                               |
| 1.35                 | 6.19E-01 | 9.75            | 1.31E-03 | 13.16          | 4.39E-04 | 69-233965-PM  | SPRT-like metalloprotease                                                                                   |
| -1.29                | 7.62E-01 | 9.49            | 1.56E-02 | 7.33           | 2.94E-02 | 429-108668-PM | Galactokinase                                                                                               |
| -1.7                 | 2.53E-01 | 9.47            | 1.05E-04 | 5.58           | 1.31E-03 | 68-256685-PM  | Heme oxygenase (decyclizing)                                                                                |
| -1.29                | 7.83E-01 | 9.23            | 2.61E-02 | 7.15           | 4.55E-02 | 57-232699-PM  | Phytanoyl-CoA dioxygenase                                                                                   |
| 1.01                 | 9.93E-01 | 8.55            | 3.10E-02 | 8.62           | 3.05E-02 | 254-235639-PM | von Willebrand factor and related coagulation proteins                                                      |
| 1.05                 | 9.57E-01 | 8.48            | 4.26E-02 | 8.94           | 3.83E-02 | 58-111021-PM  | Zn-finger. MYND type                                                                                        |
| -1.09                | 8.74E-01 | 7.42            | 1.23E-03 | 6.83           | 1.75E-03 | 61-36077-PM   | Predicted tubulin-tyrosine ligase                                                                           |
| -1.59                | 2.59E-01 | 6.88            | 1.41E-04 | 4.34           | 1.73E-03 | 131-29538-PM  | Ricin B lectin                                                                                              |
| -1.64                | 2.34E-01 | 6.82            | 1.75E-04 | 4.16           | 2.48E-03 | 69-59166-PM   | Zinc-binding oxidoreductase                                                                                 |
| -1.21                | 7.98E-01 | 6.8             | 1.67E-02 | 5.64           | 2.85E-02 | 168-52935-PM  | Two-component phosphorelay intermediate involved in MAP kinase cascade regulation. Hpt                      |
| 1.58                 | 4.81E-01 | 5.95            | 1.23E-02 | 9.41           | 2.63E-03 | 54-37594-PM   | Intradiol ring-cleavage dioxygenase                                                                         |
| -1.34                | 4.47E-01 | 5.74            | 2.34E-04 | 4.28           | 1.24E-03 | 146-108473-PM | Permease of the major facilitator superfamily                                                               |
| -1.04                | 8.95E-01 | 5.73            | 4.60E-05 | 5.49           | 6.05E-05 | 55-238491-PM  | Alpha/beta hydrolase fold                                                                                   |
| 1.3                  | 6.70E-01 | 5.57            | 1.21E-02 | 7.26           | 4.79E-03 | 236-40476-PM  | GTP-binding protein. HSR1-related. GTPase                                                                   |
| -1.61                | 2.07E-01 | 5.39            | 2.26E-04 | 3.36           | 3.81E-03 | 60-113557-PM  | Cyclin-like F-box                                                                                           |
| 1.11                 | 6.29E-01 | 5.28            | 7.56E-07 | 5.88           | 3.25E-07 | 78-255668-PM  | DNA-directed DNA polymerase                                                                                 |
| -1.63                | 1.29E-01 | 5.01            | 6.53E-05 | 3.07           | 1.95E-03 | 58-47838-PM   | Glycine dehydrogenase (decarboxylating)                                                                     |
| -1.17                | 7.68E-01 | 3.9             | 1.92E-02 | 3.33           | 3.53E-02 | 99-113614-PM  | Tetrahydrobiopterin biosynthesis enzymes-like                                                               |
| 1                    | 1.00E+00 | 3.71            | 3.57E-02 | 3.71           | 3.57E-02 | 106-106587-PM | PHD Zn-finger protein                                                                                       |
| -1.16                | 7.40E-01 | 3.71            | 8.93E-03 | 3.19           | 1.81E-02 | 81-71339-PM   | Squalene monooxygenase                                                                                      |
| -1.1                 | 7.44E-01 | 3.62            | 3.05E-04 | 3.29           | 6.23E-04 | 120-67376-PM  | Coproporphyrinogen III oxidase CPO/HEM13                                                                    |
| 1.04                 | 9.00E-01 | 3.6             | 2.23E-04 | 3.73           | 1.70E-04 | 218-231299-PM | Transcription initiation factor TFIID. subunit BDF1                                                         |

|                        |          |       |          |        |          |               |                                                                                                                 |
|------------------------|----------|-------|----------|--------|----------|---------------|-----------------------------------------------------------------------------------------------------------------|
|                        |          |       |          |        |          |               | and related bromodomain proteins                                                                                |
| 1.05                   | 8.80E-01 | 3.3   | 1.60E-03 | 3.47   | 1.15E-03 | 111-236180-PM | Cytochrome P450 CYP2 subfamily                                                                                  |
| 1.37                   | 5.67E-01 | 3.25  | 4.12E-02 | 4.44   | 1.25E-02 | 87-60997-PM   | Chromosome condensation complex Condensin. subunit G                                                            |
| 1.17                   | 6.79E-01 | 3.23  | 5.28E-03 | 3.77   | 2.13E-03 | 261-231975-PM | Splicing coactivator SRm160/300. subunit SRm300. Peptidase M. neutral zinc metallopeptidases. zinc-binding site |
| 1.2                    | 7.33E-01 | 3.2   | 3.71E-02 | 3.82   | 1.84E-02 | 69-37220-PM   | Notchless-like WD40 repeat-containing protein. G-protein                                                        |
| 1.23                   | 4.79E-01 | 3.06  | 1.21E-03 | 3.77   | 2.55E-04 | 103-83427-PM  | H+/oligopeptide symporter. TGF-beta receptor. type I/II extracellular region                                    |
| -1.14                  | 9.08E-01 | 30.38 | 7.94E-03 | 26.61  | 1.02E-02 | 108-113864-PM | <i>unknown</i>                                                                                                  |
| -1.72                  | 4.79E-01 | 20.39 | 8.56E-04 | 11.89  | 4.10E-03 | 243-241485-PM | <i>unknown</i>                                                                                                  |
| -1.62                  | 4.43E-01 | 19.27 | 1.70E-04 | 11.87  | 9.13E-04 | 113-233311-PM | <i>unknown</i>                                                                                                  |
| -1.87                  | 3.17E-01 | 17.15 | 2.20E-04 | 9.16   | 2.03E-03 | 249-238674-PM | <i>unknown</i>                                                                                                  |
| 1.11                   | 8.73E-01 | 16.41 | 4.14E-04 | 18.2   | 2.93E-04 | 96-231761-PM  | <i>unknown</i>                                                                                                  |
| 1.24                   | 6.65E-01 | 14.31 | 3.93E-05 | 17.71  | 1.63E-05 | 95-236353-PM  | <i>unknown</i>                                                                                                  |
| -1.5                   | 3.57E-01 | 13.26 | 1.28E-05 | 8.86   | 8.66E-05 | 165-113776-PM | <i>unknown</i>                                                                                                  |
| 1.01                   | 9.86E-01 | 12.62 | 1.17E-03 | 12.77  | 1.12E-03 | 370-38937-PM  | <i>unknown</i>                                                                                                  |
| -1.13                  | 8.71E-01 | 11.23 | 5.49E-03 | 9.9    | 7.82E-03 | 75-230599-PM  | <i>unknown</i>                                                                                                  |
| 1.47                   | 3.18E-01 | 11.04 | 6.01E-06 | 16.19  | 9.12E-07 | 264-48837-PM  | <i>unknown</i>                                                                                                  |
| 1.34                   | 7.40E-01 | 10.51 | 1.52E-02 | 14.11  | 7.47E-03 | 207-233156-PM | <i>unknown</i>                                                                                                  |
| 1.68                   | 3.93E-01 | 10.24 | 1.09E-03 | 17.21  | 1.66E-04 | 74-107062-PM  | <i>unknown</i>                                                                                                  |
| -1.26                  | 7.12E-01 | 8.85  | 2.64E-03 | 7.01   | 5.93E-03 | 56-112604-PM  | <i>unknown</i>                                                                                                  |
| 1.23                   | 6.86E-01 | 8.41  | 5.76E-04 | 10.35  | 2.39E-04 | 56-114493-PM  | <i>unknown</i>                                                                                                  |
| 1.44                   | 6.98E-01 | 7.91  | 4.00E-02 | 11.42  | 1.80E-02 | 152-84654-PM  | <i>unknown</i>                                                                                                  |
| 1.03                   | 9.57E-01 | 7.46  | 7.17E-04 | 7.66   | 6.38E-04 | 99-58098-PM   | <i>unknown</i>                                                                                                  |
| -1.87                  | 4.00E-02 | 7.18  | 2.19E-06 | 3.84   | 1.78E-04 | 233-241488-PM | <i>unknown</i>                                                                                                  |
| 1.03                   | 9.71E-01 | 7.12  | 1.11E-02 | 7.3    | 1.03E-02 | 120-257269-PM | <i>unknown</i>                                                                                                  |
| -1.83                  | 3.45E-02 | 6.85  | 1.20E-06 | 3.75   | 1.03E-04 | 57-232483-PM  | <i>unknown</i>                                                                                                  |
| 1.21                   | 7.44E-01 | 6     | 6.28E-03 | 7.25   | 3.07E-03 | 63-16019-PM   | <i>unknown</i>                                                                                                  |
| 1.79                   | 3.97E-01 | 5.28  | 2.40E-02 | 9.46   | 3.84E-03 | 54-106345-PM  | <i>unknown</i>                                                                                                  |
| 1.32                   | 4.48E-01 | 5.25  | 2.68E-04 | 6.96   | 5.29E-05 | 187-105384-PM | <i>unknown</i>                                                                                                  |
| -1.16                  | 6.44E-01 | 4.95  | 7.66E-05 | 4.28   | 2.05E-04 | 56-53807-PM   | <i>unknown</i>                                                                                                  |
| -1.36                  | 3.10E-01 | 4.66  | 6.70E-05 | 3.42   | 6.12E-04 | 55-85639-PM   | <i>unknown</i>                                                                                                  |
| 1.49                   | 4.82E-01 | 4.46  | 1.56E-02 | 6.66   | 3.38E-03 | 191-102263-PM | <i>unknown</i>                                                                                                  |
| 1.16                   | 7.74E-01 | 4.18  | 1.38E-02 | 4.86   | 7.45E-03 | 576-113450-PM | <i>unknown</i>                                                                                                  |
| 1.7                    | 2.45E-01 | 4.09  | 5.31E-03 | 6.95   | 3.94E-04 | 273-108673-PM | <i>unknown</i>                                                                                                  |
| 1.27                   | 7.07E-01 | 3.79  | 4.79E-02 | 4.81   | 2.23E-02 | 59-114329-PM  | <i>Uncharacterized conserved protein</i>                                                                        |
| 1.58                   | 4.33E-01 | 3.77  | 3.31E-02 | 5.96   | 6.22E-03 | 92-234309-PM  | <i>unknown</i>                                                                                                  |
| -1.04                  | 9.31E-01 | 3.62  | 1.61E-02 | 3.47   | 1.93E-02 | 296-11856-PM  | <i>unknown</i>                                                                                                  |
| 1.52                   | 4.42E-01 | 3.45  | 3.32E-02 | 5.25   | 6.44E-03 | 67-231760-PM  | <i>unknown</i>                                                                                                  |
| 1.25                   | 6.14E-01 | 3.1   | 1.85E-02 | 3.88   | 6.27E-03 | 138-51005-PM  | <i>unknown</i>                                                                                                  |
| 1.26                   | 6.61E-01 | 3.01  | 4.62E-02 | 3.78   | 1.88E-02 | 70-82151-PM   | <i>unknown</i>                                                                                                  |
| <b>REPRESSED GENES</b> |          |       |          |        |          |               |                                                                                                                 |
| 1.17                   | 8.30E-01 | -56.8 | 4.08E-05 | -48.38 | 6.37E-05 | 106-111246-PM | Cyclin-like F-box                                                                                               |
| -1.1                   | 7.94E-01 | -45.3 | 8.75E-09 | -49.94 | 6.03E-09 | 54-75404-PM   | Fumarate reductase. flavoprotein subunit. Succinate dehydrogenase                                               |
| -1.2                   | 7.95E-01 | -32.5 | 2.80E-05 | -38.15 | 1.66E-05 | 183-256250-PM | Zn-finger. C2H2 type                                                                                            |
| -1.1                   | 9.14E-01 | -29.5 | 1.79E-05 | -31.44 | 1.44E-05 | 65-233429-PM  | Predicted transporter (major facilitator superfamily). Tetracycline resistance protein TetB                     |
| -1.1                   | 9.26E-01 | -26.6 | 6.44E-05 | -28.23 | 5.31E-05 | 54-112999-PM  | peroxidase activity. Haem peroxidase. plant/fungal/bacterial                                                    |
| 1.3                    | 7.68E-01 | -26.4 | 1.63E-03 | -20.3  | 3.12E-03 | 159-102651-PM | WD40 repeat protein G-protein                                                                                   |
| 1.31                   | 6.40E-01 | -22.6 | 3.97E-05 | -17.23 | 1.06E-04 | 189-52965-PM  | Predicted hydrolases or acyltransferases (alpha/beta hydrolase superfamily). Epoxide hydrolase                  |

|      |          |       |          |        |          |               |                                                                                                                                                   |
|------|----------|-------|----------|--------|----------|---------------|---------------------------------------------------------------------------------------------------------------------------------------------------|
| 1.03 | 9.74E-01 | -20.8 | 8.96E-04 | -20.3  | 9.63E-04 | 78-70937-PM   | Dynactin subunit p27/WS-3. involved in transport of organelles along microtubules                                                                 |
| 1.29 | 6.65E-01 | -20.7 | 7.41E-05 | -16.01 | 1.86E-04 | 118-105103-PM | Phosphoglycerate mutase                                                                                                                           |
| -1.1 | 9.29E-01 | -17.9 | 1.23E-02 | -19.63 | 1.02E-02 | 132-49025-PM  | Protein involved in vacuolar protein sorting                                                                                                      |
| -1.6 | 5.76E-01 | -16.5 | 3.24E-03 | -26.32 | 9.42E-04 | 61-16399-PM   | Cytochrome P450 CYP3/CYP5/CYP6/CYP9 subfamilies                                                                                                   |
| 1.1  | 9.03E-01 | -15.2 | 2.32E-03 | -13.82 | 3.03E-03 | 105-255629-PM | Esterase D                                                                                                                                        |
| 1.75 | 3.39E-01 | -14.5 | 2.07E-04 | -8.3   | 1.71E-03 | 66-12537-PM   | Glucose-6-phosphate 1-dehydrogenase                                                                                                               |
| 1.45 | 4.72E-01 | -14.4 | 6.40E-05 | -9.89  | 2.99E-04 | 68-61335-PM   | RNA polymerase III subunit C11                                                                                                                    |
| 1.33 | 2.26E-01 | -14.2 | 1.40E-09 | -10.67 | 7.62E-09 | 66-52108-PM   | Peptidase M35. deuterolysin                                                                                                                       |
| 1.19 | 7.71E-01 | -13.5 | 4.42E-04 | -11.33 | 8.35E-04 | 134-81735-PM  | Protein required for meiosis                                                                                                                      |
| 1.65 | 1.57E-01 | -13.2 | 7.38E-07 | -7.99  | 1.14E-05 | 60-56910-PM   | Ubiquitin-like protein                                                                                                                            |
| 1.46 | 5.58E-01 | -12.9 | 8.47E-04 | -8.83  | 3.09E-03 | 97-73874-PM   | 26S proteasome regulatory complex. subunit RPN6/PSMD11                                                                                            |
| 1.3  | 4.88E-01 | -12.1 | 3.94E-06 | -9.31  | 1.54E-05 | 143-67567-PM  | Cytochrome P450 CYP4/CYP19/CYP26 subfamilies                                                                                                      |
| 1.98 | 1.54E-01 | -11.9 | 4.92E-05 | -5.98  | 1.15E-03 | 84-77964-PM   | Glycoside hydrolase. family 61                                                                                                                    |
| 1.2  | 6.48E-01 | -10.9 | 1.44E-05 | -9.08  | 3.64E-05 | 161-254867-PM | Multicopper oxidases. Laccase                                                                                                                     |
| 1.67 | 5.46E-01 | -10.8 | 1.07E-02 | -6.46  | 3.80E-02 | 480-231100-PM | NADH-cytochrome b-5 reductase. KOG0534: NADH-cytochrome b-5 reductase                                                                             |
| -1.2 | 2.49E-01 | -10.3 | 1.05E-11 | -12.28 | 3.34E-12 | 53-11367-PM   | Fungal hydrophobin                                                                                                                                |
| 1.77 | 3.52E-01 | -8.98 | 1.88E-03 | -5.07  | 1.46E-02 | 423-108300-PM | Immunoglobulin and related proteins. Cytochrome c heme-binding site                                                                               |
| 1.02 | 9.84E-01 | -7.96 | 2.13E-02 | -7.83  | 2.23E-02 | 60-255897-PM  | G-protein beta WD-40 repeat                                                                                                                       |
| 1.84 | 2.83E-01 | -7.55 | 1.94E-03 | -4.09  | 2.06E-02 | 200-106879-PM | UbiA prenyltransferase                                                                                                                            |
| -1.5 | 6.67E-01 | -7.5  | 4.52E-02 | -11.27 | 1.87E-02 | 70-238569-PM  | Microtubule-associated protein TAU                                                                                                                |
| 1.93 | 5.16E-02 | -7.4  | 7.16E-06 | -3.83  | 5.19E-04 | 153-111169-PM | Zn-finger. RING                                                                                                                                   |
| 1.49 | 3.90E-01 | -6.8  | 5.94E-04 | -4.55  | 4.01E-03 | 152-49983-PM  | TIP41-like protein                                                                                                                                |
| 1.56 | 2.46E-01 | -6.76 | 7.32E-05 | -4.35  | 9.39E-04 | 103-76066-PM  | 26S proteasome regulatory complex. ATPase RPT4                                                                                                    |
| -1.4 | 5.43E-01 | -6.71 | 2.86E-03 | -9.42  | 7.46E-04 | 61-82928-PM   | 3-hydroxyisobutyrate dehydrogenase                                                                                                                |
| 1.42 | 5.66E-01 | -6.71 | 5.41E-03 | -4.73  | 1.87E-02 | 73-75752-PM   | Mannosyl-oligosaccharide alpha-1.2-mannosidase and related glycosyl hydrolases                                                                    |
| -1.2 | 7.85E-01 | -6.62 | 2.53E-02 | -8.19  | 1.43E-02 | 94-235928-PM  | Glycoside hydrolase. family 43                                                                                                                    |
| -1.4 | 6.74E-01 | -6.6  | 1.48E-02 | -8.88  | 5.99E-03 | 62-105151-PM  | Zn-finger. MYND type                                                                                                                              |
| 1.28 | 1.70E-01 | -6.58 | 3.59E-09 | -5.16  | 2.77E-08 | 54-67642-PM   | Putative translation initiation inhibitor UK114/IBM1                                                                                              |
| -1.1 | 8.75E-01 | -6.47 | 1.31E-03 | -7     | 9.27E-04 | 157-112062-PM | P-II protein urydylatation site                                                                                                                   |
| 1.89 | 4.29E-02 | -6.44 | 6.63E-06 | -3.41  | 5.83E-04 | 97-82703-PM   | Gluconate kinase                                                                                                                                  |
| 1.88 | 2.87E-02 | -6.38 | 2.11E-06 | -3.39  | 2.42E-04 | 206-103905-PM | Splicing coactivator SRm160/300. subunit SRm300                                                                                                   |
| 1.23 | 4.16E-01 | -6.2  | 1.28E-06 | -5.04  | 5.94E-06 | 95-58166-PM   | Predicted panthothenate kinase/uridine kinase-related protein                                                                                     |
| -1.1 | 7.83E-01 | -6.16 | 2.43E-04 | -6.88  | 1.34E-04 | 308-46655-PM  | Hypoxia induced protein conserved region                                                                                                          |
| 1.04 | 9.04E-01 | -6.04 | 4.29E-05 | -5.8   | 5.52E-05 | 108-56010-PM  | Acyl-coA-binding protein. ACBP                                                                                                                    |
| -1.1 | 7.79E-01 | -5.99 | 6.54E-05 | -6.6   | 3.65E-05 | 111-255875-PM | Kynurenine aminotransferase. glutamine transaminase K                                                                                             |
| 1.63 | 2.25E-02 | -5.92 | 5.55E-08 | -3.64  | 4.05E-06 | 78-83883-PM   | 20S proteasome. regulatory subunit beta type PSMB2/PRE1                                                                                           |
| 1.14 | 6.94E-01 | -5.88 | 3.81E-05 | -5.17  | 8.65E-05 | 110-65238-PM  | GTPase Rab2. small G protein superfamily                                                                                                          |
| 1.17 | 4.74E-01 | -5.75 | 3.53E-07 | -4.91  | 1.26E-06 | 143-72421-PM  | Alcohol dehydrogenase. class III                                                                                                                  |
| -1.1 | 8.77E-01 | -5.65 | 3.76E-02 | -6.37  | 2.75E-02 | 54-81364-PM   | MADS box transcription factor                                                                                                                     |
| 1.35 | 3.67E-01 | -5.56 | 6.77E-05 | -4.1   | 4.77E-04 | 53-47866-PM   | Predicted dioxygenase                                                                                                                             |
| 1.34 | 2.54E-01 | -5.43 | 3.17E-06 | -4.05  | 3.12E-05 | 248-232365-PM | 20S proteasome. regulatory subunit alpha type PSMA7/PRE6                                                                                          |
| 1.43 | 5.66E-01 | -5.36 | 1.39E-02 | -3.74  | 4.56E-02 | 56-62348-PM   | Ca2+-binding protein (centrin/caltractin). EF-Hand superfamily protein                                                                            |
| 1.66 | 7.06E-02 | -5.34 | 7.14E-06 | -3.21  | 3.63E-04 | 74-57285-PM   | Dosage compensation regulatory complex/histone acetyltransferase complex. subunit MSL-3/MRG15/EAF3. and related CHROMO domain-containing proteins |

|      |          |       |          |        |          |               |                                                                                                           |
|------|----------|-------|----------|--------|----------|---------------|-----------------------------------------------------------------------------------------------------------|
| 1.04 | 9.19E-01 | -5.33 | 2.29E-04 | -5.14  | 2.85E-04 | 53-231008-PM  | Von Willebrand factor and related coagulation proteins                                                    |
| 1.24 | 5.33E-01 | -5.18 | 1.46E-04 | -4.18  | 5.67E-04 | 102-14057-PM  | Branched chain alpha-keto acid dehydrogenase E1. beta subunit                                             |
| -1   | 8.98E-01 | -4.96 | 5.18E-07 | -5.09  | 4.14E-07 | 88-77161-PM   | Zn-finger. C2H2 type                                                                                      |
| 1.17 | 6.55E-01 | -4.92 | 3.10E-04 | -4.19  | 8.23E-04 | 96-81268-PM   | Sorbitol dehydrogenase                                                                                    |
| -1.1 | 8.98E-01 | -4.65 | 2.52E-02 | -5.05  | 1.93E-02 | 401-46068-PM  | RNA polymerase III. subunit C34                                                                           |
| 1.25 | 4.45E-01 | -4.64 | 5.62E-05 | -3.7   | 2.88E-04 | 53-114479-PM  | Cyclin-like F-box                                                                                         |
| -1.3 | 6.89E-01 | -4.61 | 4.13E-02 | -6.11  | 1.82E-02 | 58-105955-PM  | von Willebrand factor and related coagulation proteins                                                    |
| 1    | 9.96E-01 | -4.59 | 4.47E-04 | -4.58  | 4.52E-04 | 96-48271-PM   | PP-loop. Uncharacterized conserved protein with similarity to predicted ATPase of the PP-loop superfamily |
| 1.43 | 3.84E-01 | -4.56 | 1.46E-03 | -3.19  | 1.00E-02 | 170-46550-PM  | Replication factor C. subunit RFC1 (large subunit). BRCT                                                  |
| 1.41 | 1.24E-01 | -4.55 | 1.76E-06 | -3.23  | 3.94E-05 | 170-113902-PM | Multidrug/pheromone exporter. ABC superfamily                                                             |
| 1.3  | 4.24E-01 | -4.54 | 1.82E-04 | -3.5   | 1.05E-03 | 142-13020-PM  | 20S proteasome. regulatory subunit alpha type PSMA1/PRE5                                                  |
| 1.15 | 6.90E-01 | -4.54 | 4.84E-04 | -3.94  | 1.16E-03 | 143-255062-PM | Permease of the major facilitator superfamily                                                             |
| 1.06 | 8.66E-01 | -4.39 | 4.19E-04 | -4.14  | 6.05E-04 | 329-69673-PM  | UDP-glucose pyrophosphorylase                                                                             |
| 1.33 | 5.27E-01 | -4.37 | 4.09E-03 | -3.28  | 1.61E-02 | 60-61466-PM   | Predicted molecular chaperone (DnaJ superfamily)                                                          |
| 1.24 | 5.91E-01 | -4.22 | 2.00E-03 | -3.4   | 6.51E-03 | 154-114488-PM | DNA polymerase sigma. PAP/25A-associated                                                                  |
| 1.25 | 6.17E-01 | -4.04 | 5.33E-03 | -3.24  | 1.57E-02 | 62-48129-PM   | Transcription initiation factor TFIID. subunit TAF5 (also component of histone acetyltransferase SAGA)    |
| 1.21 | 6.68E-01 | -3.95 | 6.38E-03 | -3.26  | 1.60E-02 | 73-69593-PM   | Alcohol dehydrogenase. class IV                                                                           |
| 1.28 | 5.10E-01 | -3.95 | 1.44E-03 | -3.1   | 6.18E-03 | 96-71602-PM   | Ricin B lectin                                                                                            |
| 1.2  | 4.89E-01 | -3.88 | 5.93E-05 | -3.24  | 2.60E-04 | 111-106337-PM | Zn-finger. MYND type                                                                                      |
| 1.06 | 7.99E-01 | -3.82 | 8.36E-06 | -3.62  | 1.38E-05 | 87-83849-PM   | Aldehyde dehydrogenase                                                                                    |
| 1.13 | 7.26E-01 | -3.8  | 1.21E-03 | -3.36  | 2.61E-03 | 82-258522-PM  | Mandelate racemase/muconate lactonizing enzyme. Galactonate dehydratase                                   |
| -1.6 | 1.38E-01 | -3.75 | 5.33E-04 | -6.07  | 2.11E-05 | 304-13426-PM  | TatD-related DNase                                                                                        |
| 1.12 | 7.64E-01 | -3.72 | 2.76E-03 | -3.32  | 5.33E-03 | 185-37734-PM  | Anaphase-promoting complex (APC). subunit 10                                                              |
| 1.19 | 6.62E-01 | -3.59 | 4.02E-03 | -3.02  | 1.04E-02 | 233-82620-PM  | Predicted MutS-related protein involved in mismatch repair                                                |
| -1.1 | 7.50E-01 | -3.56 | 1.72E-04 | -3.88  | 8.72E-05 | 171-235829-PM | Cyclin-like F-box                                                                                         |
| 1.03 | 9.42E-01 | -3.54 | 1.30E-02 | -3.42  | 1.52E-02 | 67-71876-PM   | Translation initiation factor 2C (eIF-2C) and related proteins. Argonaute and Dicer protein. PAZ          |
| 1.14 | 5.00E-01 | -3.5  | 6.52E-06 | -3.06  | 2.51E-05 | 53-14572-PM   | MOT2 transcription factor. RNA-binding region RNP-1 (RNA recognition motif)                               |
| -1.2 | 5.63E-01 | -3.49 | 3.17E-03 | -4.32  | 8.84E-04 | 78-84564-PM   | Lipase. active site                                                                                       |
| -1.1 | 8.48E-01 | -3.45 | 9.31E-03 | -3.74  | 6.15E-03 | 67-111476-PM  | Acinus (induces apoptotic chromatin condensation)                                                         |
| -1.4 | 3.24E-01 | -3.41 | 3.26E-03 | -4.9   | 3.63E-04 | 112-68620-PM  | Beta subunit of farnesyltransferase                                                                       |
| -1.5 | 2.12E-01 | -3.37 | 8.48E-04 | -4.98  | 5.48E-05 | 275-69750-PM  | Carbohydrate-binding domain. family V/XII                                                                 |
| -1.5 | 1.94E-01 | -3.36 | 1.04E-03 | -5.09  | 5.93E-05 | 58-256647-PM  | Protein involved in Snf1 protein kinase complex assembly                                                  |
| -1   | 9.90E-01 | -3.32 | 1.89E-03 | -3.34  | 1.84E-03 | 148-109979-PM | Protein kinase containing WD40 repeats                                                                    |
| -1.1 | 4.68E-01 | -3.29 | 5.17E-06 | -3.76  | 1.32E-06 | 106-255161-PM | Heat shock transcription factor                                                                           |
| -1.1 | 7.65E-01 | -3.25 | 3.74E-03 | -3.62  | 1.94E-03 | 238-51868-PM  | Cytosine deaminase FCY1 and related enzymes                                                               |
| -1.1 | 7.03E-01 | -3.19 | 1.66E-03 | -3.6   | 7.18E-04 | 169-257326-PM | Splicing coactivator SRm160/300. subunit SRm300. Glucan 1.4-alpha-glucosidase                             |
| -1.3 | 5.86E-01 | -3.16 | 1.07E-02 | -3.95  | 3.25E-03 | 130-102431-PM | Cyclin-like F-box                                                                                         |
| -1.9 | 1.63E-01 | -3.03 | 1.95E-02 | -5.66  | 8.61E-04 | 61-33094-PM   | Transcription initiation factor TFIID. subunit TAF11                                                      |
| -1.2 | 4.21E-01 | -3.01 | 5.29E-04 | -3.72  | 9.23E-05 | 106-103430-PM | Predicted signal transduction protein. Protein-tyrosine-phosphatase                                       |
| -1.1 | 8.85E-01 | -132  | 3.69E-07 | -144.8 | 2.88E-07 | 55-103113-PM  | <i>unknown</i>                                                                                            |
| -1.4 | 6.44E-01 | -76.8 | 7.21E-06 | -105.9 | 2.97E-06 | 87-112677-PM  | <i>unknown</i>                                                                                            |
| -1   | 9.95E-01 | -50.5 | 1.10E-04 | -50.71 | 1.08E-04 | 119-111173-PM | <i>unknown</i>                                                                                            |

|      |          |       |          |        |          |               |                                          |
|------|----------|-------|----------|--------|----------|---------------|------------------------------------------|
| -1.4 | 7.05E-01 | -27.3 | 1.41E-03 | -38.09 | 6.14E-04 | 88-84888-PM   | <i>unknown</i>                           |
| 1.05 | 9.61E-01 | -20   | 1.13E-02 | -18.95 | 1.25E-02 | 131-61214-PM  | <i>unknown</i>                           |
| 1.43 | 7.07E-01 | -19.1 | 6.16E-03 | -13.31 | 1.38E-02 | 64-85084-PM   | <i>unknown</i>                           |
| -1.9 | 4.73E-01 | -15.7 | 6.85E-03 | -30.3  | 1.41E-03 | 588-14082-PM  | <i>unknown</i>                           |
| -1.8 | 3.30E-01 | -15.5 | 3.01E-04 | -28.4  | 3.73E-05 | 88-257049-PM  | <i>unknown</i>                           |
| 1.08 | 9.01E-01 | -14.5 | 5.64E-04 | -13.42 | 7.41E-04 | 87-12684-PM   | <i>unknown</i>                           |
| -1.8 | 4.70E-01 | -11.4 | 9.26E-03 | -20.92 | 1.89E-03 | 59-106970-PM  | <i>unknown</i>                           |
| 1.16 | 7.44E-01 | -11   | 4.57E-05 | -9.5   | 9.03E-05 | 84-63789-PM   | <i>unknown</i>                           |
| -1.2 | 7.84E-01 | -9.43 | 2.69E-03 | -11.27 | 1.47E-03 | 82-255226-PM  | <i>unknown</i>                           |
| -1.4 | 7.09E-01 | -9.23 | 1.81E-02 | -12.74 | 8.16E-03 | 93-230979-PM  | <i>unknown</i>                           |
| 1.44 | 5.93E-01 | -8.57 | 5.26E-03 | -5.94  | 1.67E-02 | 237-103277-PM | <i>unknown</i>                           |
| -1.8 | 1.05E-01 | -8.41 | 5.50E-06 | -14.73 | 2.60E-07 | 90-110679-PM  | <i>unknown</i>                           |
| 1.58 | 6.79E-02 | -7.83 | 1.05E-07 | -4.96  | 3.02E-06 | 53-74722-PM   | <i>Uncharacterized conserved protein</i> |
| 1.06 | 8.43E-01 | -6.83 | 1.70E-06 | -6.47  | 2.46E-06 | 209-103063-PM | <i>unknown</i>                           |
| 1.19 | 7.86E-01 | -6.62 | 9.30E-03 | -5.55  | 1.66E-02 | 287-232649-PM | <i>unknown</i>                           |
| -1.4 | 4.13E-01 | -6.4  | 1.31E-04 | -8.78  | 2.35E-05 | 191-235337-PM | <i>unknown</i>                           |
| -1   | 9.77E-01 | -5.99 | 1.22E-03 | -6.07  | 1.14E-03 | 61-86084-PM   | <i>unknown</i>                           |
| 1.32 | 6.55E-01 | -5.69 | 1.19E-02 | -4.3   | 3.05E-02 | 111-106390-PM | <i>unknown</i>                           |
| 1.13 | 7.00E-01 | -5.67 | 2.99E-05 | -5.03  | 6.63E-05 | 180-85576-PM  | <i>unknown</i>                           |
| 1.27 | 7.19E-01 | -5.5  | 1.90E-02 | -4.32  | 3.98E-02 | 383-102818-PM | <i>unknown</i>                           |
| 1.31 | 6.41E-01 | -5.2  | 1.05E-02 | -3.96  | 2.80E-02 | 112-11429-PM  | <i>unknown</i>                           |
| 1.35 | 3.71E-01 | -4.94 | 1.39E-04 | -3.66  | 9.85E-04 | 58-84836-PM   | <i>unknown</i>                           |
| -1.3 | 2.84E-01 | -4.86 | 1.15E-05 | -6.47  | 1.44E-06 | 64-104205-PM  | <i>unknown</i>                           |
| 1.3  | 5.14E-01 | -4.5  | 1.26E-03 | -3.47  | 5.34E-03 | 288-114974-PM | <i>unknown</i>                           |
| -1.9 | 1.37E-01 | -4.43 | 1.51E-03 | -8.2   | 5.51E-05 | 94-103477-PM  | <i>unknown</i>                           |
| 1.14 | 5.88E-01 | -4.31 | 9.98E-06 | -3.78  | 2.97E-05 | 68-109462-PM  | <i>unknown</i>                           |
| -1.1 | 8.59E-01 | -4.13 | 2.36E-03 | -4.44  | 1.60E-03 | 53-104546-PM  | <i>unknown</i>                           |
| -1.1 | 7.10E-01 | -4.07 | 1.24E-04 | -4.53  | 5.68E-05 | 53-83841-PM   | <i>unknown</i>                           |
| 1.23 | 5.16E-01 | -3.82 | 5.35E-04 | -3.1   | 2.25E-03 | 83-69452-PM   | <i>unknown</i>                           |
| 1.21 | 6.39E-01 | -3.82 | 3.35E-03 | -3.17  | 9.32E-03 | 90-109477-PM  | <i>unknown</i>                           |
| 1.04 | 9.49E-01 | -3.78 | 2.51E-02 | -3.65  | 2.86E-02 | 90-235433-PM  | <i>unknown</i>                           |
| -1.5 | 3.01E-01 | -3.76 | 2.61E-03 | -5.61  | 2.62E-04 | 93-84110-PM   | <i>unknown</i>                           |
| 1.06 | 8.56E-01 | -3.66 | 8.46E-04 | -3.45  | 1.26E-03 | 69-105669-PM  | <i>unknown</i>                           |
| -1.3 | 3.81E-01 | -3.61 | 6.98E-05 | -4.5   | 1.15E-05 | 57-84920-PM   | <i>unknown</i>                           |
| -1.1 | 8.79E-01 | -3.54 | 3.76E-02 | -3.86  | 2.76E-02 | 131-53144-PM  | <i>unknown</i>                           |
| 1.06 | 9.04E-01 | -3.33 | 2.34E-02 | -3.14  | 3.00E-02 | 71-66966-PM   | <i>Unknown</i>                           |

**Table S9:** Differentially regulated genes in the pathways of Ras1/Gap1/Cdc42. Bold letters in putative function column indicate annotation of genome homepage (genome.jgi-psf.org/Schco1), normal letters indicate Blastp (blast.ncbi.nlm.nih.gov) annotated gene functions (details see Table S7). Fold = fold change, if between +2 and -2 = no regulation. Positive value = increased expression, negative value = decreased expression compared to mono- or dikaryon. Protein ID refers to numbers for proteins on genome homepage.

| putative function                                      | Comparisons                             |         |               |         |                             |         |                 |         |                |         | Protein ID |
|--------------------------------------------------------|-----------------------------------------|---------|---------------|---------|-----------------------------|---------|-----------------|---------|----------------|---------|------------|
|                                                        | Ras1/Gap1/Cdc42 pathway - induced genes |         |               |         |                             |         |                 |         |                |         |            |
|                                                        | Ras1 vs. 12-43                          |         | Ras1 vs. 4-39 |         | ΔGap1 x ΔGap1 vs. W22x12-43 |         | Cdc42 vs. 12-43 |         | Cdc42 vs. 4-39 |         |            |
| Fold                                                   | pValue                                  | Fold    | pValue        | Fold    | pValue                      | Fold    | pValue          | Fold    | pValue         | Fold    | pValue     |
| <b>ray4. Homeodomain transcription factor activity</b> | 11.1                                    | 2.14E-3 | 14.2          | 9.55E-4 | 9.89                        | 3.07E-3 | 7.21            | 8.55E-3 | 9.23           | 3.85E-3 | 231556     |
| <b>Zn-finger. CCHC type. nucleic acid binding</b>      | 12.9                                    | 2.08E-3 | 15            | 1.31E-3 | 16.85                       | 9.09E-4 | 5.37            | 2.89E-2 | 6.23           | 1.88E-2 | 237097     |

|                                                                                                                        |                |          |               |          |                               |          |                 |         |                |         |        |
|------------------------------------------------------------------------------------------------------------------------|----------------|----------|---------------|----------|-------------------------------|----------|-----------------|---------|----------------|---------|--------|
| general substrate transporter                                                                                          | 4.88           | 5.68E-3  | 3.05          | 4.00E-2  | 7.98                          | 6.80E-4  | 15              | 4.80E-5 | 9.36           | 3.44E-4 | 66123  |
| <i>axx4</i> ; protein of unknown function                                                                              | 39.6           | 5.69E-7  | 37.7          | 6.77E-7  | 8.52                          | 3.05E-4  | 15              | 2.58E-5 | 14.3           | 3.15E-5 | 64664  |
| vomer nasal 1 receptor monDomV1R1217 [ <i>Monodelphis domestica</i> ]                                                  | 19.5           | 2.92E-6  | 10.1          | 5.70E-5  | 39.02                         | 1.81E-7  | 36.8            | 2.25E-7 | 19             | 3.26E-6 | 237981 |
| secreted protein [ <i>Melampsora larici-populina</i> 98AG31]                                                           | 4.95           | 1.70E-3  | 6.88          | 3.26E-4  | 4.14                          | 4.18E-3  | 8.68            | 1.04E-4 | 12.1           | 2.18E-5 | 27681  |
| F-Box containing protein                                                                                               | 4.01           | 2.16E-2  | 6.76          | 2.86E-3  | 6.16                          | 4.12E-3  | 4.71            | 1.17E-2 | 7.94           | 1.52E-3 | 105141 |
| <b>Ras1/Gap1/Cdc42 pathway - repressed genes</b>                                                                       |                |          |               |          |                               |          |                 |         |                |         |        |
|                                                                                                                        | Ras1 vs. 12-43 |          | Ras1 vs. 4-39 |          | ΔGap1 x ΔGap1 vs. W22 x 12-43 |          | Cdc42 vs. 12-43 |         | Cdc42 vs. 4-39 |         |        |
|                                                                                                                        | Fold           | pValue   | Fold          | pValue   | Fold                          | pValue   | Fold            | pValue  | Fold           | pValue  |        |
| serine/threonine-protein kinase involved in autophagy. kinase activity. transmembrane receptor protein kinase activity | -21.5          | 1.00E-5  | -13.62        | 6.32E-5  | -3.88                         | 1.40E-2  | -17.3           | 2.37E-5 | -11            | 1.57E-4 | 235720 |
| FMN-dependent alpha-hydroxy acid dehydrogenase. electron transport. Glycolate oxidase                                  | -18            | 7.52E-3  | -15.37        | 1.07E-2  | -11.6                         | 1.97E-2  | -44.7           | 9.59E-4 | -38            | 1.37E-3 | 48810  |
| complement regulator acquiring protein 1 [ <i>Borrelia burgdorferi</i> ]                                               | -192           | 4.11E-11 | -240.4        | 2.14E-11 | -327                          | 8.99E-12 | -3.75           | 1.73E-3 | -4.7           | 4.52E-4 | 85939  |
| colicin I receptor [ <i>Stenotrophomonas sp.</i> SKA14]                                                                | -7.7           | 1.38E-6  | -9.09         | 4.86E-7  | -7.41                         | 1.75E-6  | -3.39           | 4.46E-4 | -4             | 1.27E-4 | 81398  |
| ubiquitin ligase protein MIB2. putative [ <i>Pediculus humanus corporis</i> ]                                          | -7.69          | 1.02E-3  | -12.04        | 1.58E-4  | -118                          | 4.88E-8  | -10.8           | 2.43E-4 | -17            | 3.99E-5 | 50388  |
| integral membrane protein [ <i>Mycoplasma penetrans</i> HF-2]                                                          | -9.46          | 8.72E-3  | -7.18         | 1.87E-2  | -20.6                         | 9.49E-4  | -28.1           | 3.92E-4 | -21            | 8.59E-4 | 231319 |
| Nnf1 superfamily. polyamine-modulated factor 1 [ <i>Xenopus tropicalis</i> ]                                           | -5.06          | 3.71E-3  | -3.09         | 3.17E-2  | -3.13                         | 3.03E-2  | -41.5           | 5.99E-7 | -25            | 3.76E-6 | 107950 |
| <b>Ras1/Gap1 pathway - induced genes</b>                                                                               |                |          |               |          |                               |          |                 |         |                |         |        |
|                                                                                                                        | Ras1 vs. 12-43 |          | Ras1 vs. 4-39 |          | ΔGap1 x ΔGap1 vs. W22 x 12-43 |          | Cdc42 vs. 12-43 |         | Cdc42 vs. 4-39 |         |        |
|                                                                                                                        | Fold           | pValue   | Fold          | pValue   | Fold                          | pValue   | Fold            | pValue  | Fold           | pValue  |        |
| 3-hydroxy-anthranilate oxygenase HAAO. tryptophan metabolism                                                           | 268.7          | 2.16E-12 | 365.3         | 9.11E-13 | 425.9                         | 6.01E-13 | 1.1             | 6.85E-1 | 1.6            | 1.82E-1 | 86160  |
| multidrug/pheromone exporter. ABC superfamily                                                                          | 25.8           | 1.21E-3  | 14.35         | 5.52E-3  | 21.55                         | 1.93E-3  | 1.3             | 7.88E-1 | -1.43          | 6.75E-1 | 60306  |
| SNF2 family DNA-                                                                                                       | 3.63           | 3.35E-3  | 4.4           | 1.11E-3  | 3.15                          | 7.41E-3  | 1.1             | 8.94E-1 | 1.3            | 5.26E-1 | 50771  |

|                                                                                       |                |          |               |          |                               |         |                 |         |                |         |        |
|---------------------------------------------------------------------------------------|----------------|----------|---------------|----------|-------------------------------|---------|-----------------|---------|----------------|---------|--------|
| <b>dependent ATPase domain-containing protein. Helicase. C-terminal</b>               |                |          |               |          |                               |         |                 |         |                |         |        |
| DUF544 superfamily. protein of unknown function                                       | 22.04          | 3.08E-6  | 19.86         | 4.73E-6  | 5.71                          | 1.32E-3 | -1.55           | 3.48E-1 | -1.7           | 2.48E-1 | 50742  |
| nuclear transport factor 2 (NTF2) family protein [ <i>Arabidopsis thaliana</i> ]      | 6.33           | 1.20E-2  | 6.72          | 9.85E-3  | 4.59                          | 3.28E-2 | -1.61           | 4.78E-1 | -1.5           | 5.35E-1 | 231457 |
| DUF89 domain-containing protein [ <i>Coprinopsis cinerea okayama7#130</i> ]           | 3.56           | 3.91E-2  | 4.65          | 1.49E-2  | 10.59                         | 6.63E-4 | -1.67           | 3.81E-1 | -1.3           | 6.76E-1 | 80832  |
| <b>Ras1/Gap1 pathway - repressed genes</b>                                            |                |          |               |          |                               |         |                 |         |                |         |        |
|                                                                                       | Ras1 vs. 12-43 |          | Ras1 vs. 4-39 |          | ΔGap1 x ΔGap1 vs. W22 x 12-43 |         | Cdc42 vs. 12-43 |         | Cdc42 vs. 4-39 |         |        |
|                                                                                       | Fold           | pValue   | Fold          | pValue   | Fold                          | pValue  | Fold            | pValue  | Fold           | pValue  |        |
| <b>mitochondrial carnitine-acylcarnitine carrier protein</b>                          | -173           | 7.19E-10 | -226          | 3.31E-10 | -3.46                         | 8.71E-3 | 1.5             | 3.63E-1 | 1.1            | 7.70E-1 | 72928  |
| <b>5' nucleotidase. Metallophosphoesterase</b>                                        | -132           | 5.25E-6  | -189.8        | 2.15E-6  | -14.5                         | 2.35E-3 | 1.2             | 8.52E-1 | -1.2           | 7.74E-1 | 69253  |
| <b>histidine acid phosphatase</b>                                                     | -26.9          | 3.65E-8  | -37.53        | 9.02E-9  | -4.15                         | 7.75E-4 | 1.3             | 4.68E-1 | -1.1           | 8.38E-1 | 65802  |
| <b>cyclophilin-type peptidyl-prolyl cis-trans isomerase. RNA-binding region RNP-1</b> | -44.3          | 3.84E-5  | -33.11        | 9.17E-5  | -11.6                         | 2.37E-3 | 1.3             | 7.23E-1 | 1.7            | 4.44E-1 | 50077  |
| <b>cyclophilin type peptidyl-prolyl cis-trans isomerase</b>                           | -3.35          | 1.47E-3  | -5.33         | 6.64E-5  | -4.39                         | 2.37E-4 | 1.3             | 4.73E-1 | -1.26          | 4.79E-1 | 78835  |
| glycosyl transferase. family 2 [ <i>Crocospaera watsonii</i> WH 8501]                 | -18.9          | 8.65E-4  | -10           | 5.74E-3  | -22.4                         | 5.28E-4 | -1.54           | 5.61E-1 | 1.2            | 7.81E-1 | 256679 |
| hypothetical protein                                                                  | -10            | 6.42E-3  | -9.78         | 6.88E-3  | -14.7                         | 2.10E-3 | -1.51           | 5.83E-1 | -1.5           | 6.05E-1 | 109956 |
| <b>Ras1/Cdc42 pathway - induced genes</b>                                             |                |          |               |          |                               |         |                 |         |                |         |        |
|                                                                                       | Ras1 vs. 12-43 |          | Ras1 vs. 4-39 |          | ΔGap1 x ΔGap1 vs. W22 x 12-43 |         | Cdc42 vs. 12-43 |         | Cdc42 vs. 4-39 |         |        |
|                                                                                       | Fold           | pValue   | Fold          | pValue   | Fold                          | pValue  | Fold            | pValue  | Fold           | pValue  |        |
| <b>Cyclin-dependent protein kinase activity</b>                                       | 3.57           | 3.44E-2  | 3.24          | 4.87E-2  | 1.84                          | 2.84E-1 | 9.57            | 7.75E-4 | 8.68           | 1.13E-3 | 230362 |
| <b>Cyclin-like F-box. Cyclic nucleotide-binding</b>                                   | 9.22           | 9.20E-4  | 12.1          | 3.17E-4  | -1.3                          | 6.71E-1 | 5.74            | 5.83E-3 | 7.56           | 2.00E-3 | 256849 |
| <b>SWI-SNF chromatin-remodeling complex protein</b>                                   | 3.06           | 1.35E-2  | 4.21          | 2.50E-3  | 1.74                          | 1.89E-1 | 4.9             | 1.11E-3 | 6.75           | 2.05E-4 | 255941 |
| <b>Ankyrin</b>                                                                        | 6.01           | 1.87E-3  | 4.99          | 4.23E-3  | -1.3                          | 5.54E-1 | 4.82            | 4.96E-3 | 4.01           | 1.11E-2 | 107207 |
| <b>cytochrome P450 . Unspecific monooxygenase</b>                                     | 4.07           | 1.57E-3  | 4.03          | 1.66E-3  | -1.1                          | 7.91E-1 | 3.57            | 3.39E-3 | 3.53           | 3.59E-3 | 55523  |
| RTA1 domain protein [ <i>Aspergillus oryzae</i> RIB40]                                | 22.6           | 1.49E-3  | 34.9          | 4.77E-4  | -1.2                          | 8.02E-1 | 38.7            | 3.66E-4 | 59.7           | 1.20E-4 | 46742  |
| spore wall assembly - related protein                                                 | 10.2           | 8.06E-5  | 6.55          | 6.33E-4  | -1.1                          | 8.18E-1 | 8.87            | 1.51E-4 | 5.72           | 1.21E-3 | 53069  |

|                                                                                                                            |                |           |               |           |                               |         |                 |         |                |         |        |
|----------------------------------------------------------------------------------------------------------------------------|----------------|-----------|---------------|-----------|-------------------------------|---------|-----------------|---------|----------------|---------|--------|
| [ <i>Cryptococcus gattii</i> WM276]<br>gamma-glutamyltranspeptidase<br>[ <i>Alteromonas macleodii</i> str. 'Deep ecotype'] | 4.5            | 1.01E-3   | 5.64          | 2.82E-4   | 1.43                          | 3.63E-1 | 7.72            | 5.00E-5 | 9.66           | 1.52E-5 | 236328 |
| <b>Ras1/Cdc42 pathway - repressed genes</b>                                                                                |                |           |               |           |                               |         |                 |         |                |         |        |
|                                                                                                                            | Ras1 vs. 12-43 |           | Ras1 vs. 4-39 |           | ΔGap1 x ΔGap1 vs. W22 x 12-43 |         | Cdc42 vs. 12-43 |         | Cdc42 vs. 4-39 |         |        |
|                                                                                                                            | Fold           | pValue    | Fold          | pValue    | Fold                          | pValue  | Fold            | pValue  | Fold           | pValue  |        |
| <b>carbon-nitrogen hydrolase. Nitrilase/cyanide hydratase and apolipoprotein N-acyltransferase</b>                         | -522           | 1.94 E-10 | -478.9        | 2.40 E-10 | -1.09                         | 8.53E-1 | -3.29           | 2.08E-2 | -3             | 3.03E-2 | 81287  |
| <b>predicted hydrolase (HIT family). Zn-finger. C2H2 type</b>                                                              | -38.1          | 2.00E-5   | -59.02        | 5.10E-6   | -1.48                         | 5.34E-1 | -6.9            | 6.52E-3 | -11            | 1.42E-3 | 27513  |
| <b>D-aspartate oxidase</b>                                                                                                 | -36.8          | 2.44E-4   | -32.84        | 3.33E-4   | -1.39                         | 6.79E-1 | -11.2           | 6.62E-3 | -9.9           | 9.04E-3 | 55341  |
| <b>polynucleotide kinase 3' phosphatase</b>                                                                                | -36.1          | 3.31E-3   | -25.53        | 6.74E-3   | 1.36                          | 7.76E-1 | -17.6           | 1.42E-2 | -13            | 2.81E-2 | 81277  |
| <b>GCN5-related N-acetyltransferase</b>                                                                                    | -22.2          | 2.96E-6   | -13.08        | 2.80E-5   | -1.63                         | 2.96E-1 | -19             | 5.67E-6 | -11.           | 5.67E-5 | 80737  |
| <b>dihydrodipicolinate synthetase</b>                                                                                      | -13.6          | 1.54E-3   | -26.32        | 1.96E-4   | -1.94                         | 3.53E-1 | -12.8           | 1.85E-3 | -25            | 2.36E-4 | 82277  |
| <b>esterase/lipase/thioesterase</b>                                                                                        | -12.5          | 1.03E-5   | -8.91         | 5.35E-5   | 1.13                          | 7.61E-1 | -4.92           | 1.16E-3 | -3.5           | 6.91E-3 | 69185  |
| <b>dimeric dihydrodiol dehydrogenase. Oxidoreductase. N-terminal</b>                                                       | -9.33          | 1.42E-2   | -13.81        | 5.11E-3   | -1.68                         | 5.32E-1 | -8.37           | 1.87E-2 | -12.           | 6.80E-3 | 54187  |
| <b>serine/threonine protein kinase. HMG-I and HMG-Y. DNA-binding</b>                                                       | -6.6           | 6.33E-4   | -3.32         | 1.66E-2   | -1.36                         | 5.00E-1 | -9.19           | 1.33E-4 | -4.6           | 3.50E-3 | 112167 |
| <b>methylcrotonyl-CoA carboxylase. alpha chain/Acetyl-CoA carboxylase. biotin carboxylase subunit</b>                      | -6.22          | 8.93E-3   | -5.65         | 1.24E-2   | 1.24                          | 7.30E-1 | -5.11           | 1.74E-2 | -4.6           | 2.39E-2 | 72682  |
| <b>mercaptopyruvate sulfurtransferase/thiosulfate sulfurtransferase. Rhodanese-like</b>                                    | -5.16          | 1.18E-3   | -4.87         | 1.60E-3   | -1.16                         | 7.34E-1 | -7.41           | 1.88E-4 | -7             | 2.51E-4 | 255362 |
| <b>predicted histone tail methylase containing SET domain</b>                                                              | -5.1           | 3.94E-8   | -4.51         | 1.20E-7   | 1.35                          | 1.02E-1 | -5.79           | 1.34E-8 | -5.1           | 3.86E-8 | 84901  |
| <b>AAA+-type ATPase. Chaperonin clpA/B</b>                                                                                 | -4.65          | 9.23E-3   | -3.45         | 3.02E-2   | -1.18                         | 7.55E-1 | -8.7            | 6.98E-4 | -6.5           | 2.41E-3 | 48854  |
| <b>predicted hydrolase (HIT family). Zn-finger. C2H2 type</b>                                                              | -3.53          | 2.37E-3   | -3.74         | 1.66E-3   | 1.36                          | 3.93E-1 | -23             | 8.83E-8 | -24            | 6.81E-8 | 84558  |
| <b>telomeric DNA binding</b>                                                                                               | -18.9          | 3.58E-5   | -10.09        | 4.32E-4   | -1.12                         | 8.38E-1 | -6.09           | 3.38E-3 | -3.2           | 4.08E-2 | 256094 |



|                                                                                                                                                                                         |                |         |               |         |                               |         |                 |          |                |          |        |
|-----------------------------------------------------------------------------------------------------------------------------------------------------------------------------------------|----------------|---------|---------------|---------|-------------------------------|---------|-----------------|----------|----------------|----------|--------|
| protein [ <i>Coprinopsis cinerea okayama7#130</i> ]                                                                                                                                     |                |         |               |         |                               |         |                 |          |                |          |        |
| hypothetical protein                                                                                                                                                                    | -96.5          | 4.87E-4 | -115.4        | 3.40E-4 | -1.26                         | 8.30E-1 | -63             | 1.17E-3  | -75            | 8.15E-4  | 233957 |
| nucleoside H <sup>+</sup> symporter (3-phenylpropionic acid transporter), membrane protein [ <i>Pseudomonas brassicacearum subsp. brassicacearum</i> NFM421]                            | -43.9          | 6.33E-5 | -50.22        | 4.30E-5 | -1.36                         | 6.74E-1 | -10.1           | 5.01E-3  | -11            | 3.33E-3  | 84078  |
| hypothetical protein                                                                                                                                                                    | -17.8          | 2.70E-5 | -24.01        | 8.34E-6 | -1.98                         | 1.94E-1 | -38.8           | 1.43E-6  | -52            | 5.00E-7  | 255445 |
| GG21300 [ <i>Drosophila erecta</i> ] DAAF1_DROER Dynein assembly factor 1. axonemal homolog. Defective transmitter-recycling protein. Leucine-rich repeat-containing protein 50 homolog | -11.6          | 1.79E-4 | -9.42         | 4.25E-4 | -1.27                         | 6.43E-1 | -22             | 1.30E-5  | -18            | 2.91E-5  | 103746 |
| phosphoribosylglycinamide synthetase [ <i>Schizophyllum commune</i> H4-8]                                                                                                               | -6.97          | 1.27E-2 | -4.51         | 4.53E-2 | 1.91                          | 3.65E-1 | -11             | 3.11E-3  | -7.2           | 1.18E-2  | 108947 |
| hypothetical protein CC1G_13966 [ <i>Coprinopsis cinerea okayama7#130</i> ], LabA_like protein                                                                                          | -5.06          | 1.52E-2 | -8.45         | 2.44E-3 | 1.75                          | 3.62E-1 | -6.8            | 5.31E-3  | -11            | 8.36E-4  | 105541 |
| <b>Gap1/Cdc42 pathway - selected repressed genes</b>                                                                                                                                    |                |         |               |         |                               |         |                 |          |                |          |        |
|                                                                                                                                                                                         | Ras1 vs. 12-43 |         | Ras1 vs. 4-39 |         | ΔGap1 x ΔGap1 vs. W22 x 12-43 |         | Cdc42 vs. 12-43 |          | Cdc42 vs. 4-39 |          |        |
|                                                                                                                                                                                         | Fold           | pValue  | Fold          | pValue  | Fold                          | pValue  | Fold            | pValue   | Fold           | pValue   |        |
| hydrophobin SC1                                                                                                                                                                         | -1.18          | 7.79E-1 | -1.01         | 9.83E-1 | -32.7                         | 1.6E-4  | -16.8           | 1.62E-3  | -20            | 9.35E-5  | 49129  |
| hydrophobin SC3                                                                                                                                                                         | -1.17          | 2.83E-1 | 1.01          | 9.33E-1 | 1.01                          | 9.4E-1  | -10             | 1.05E-11 | -12            | 3.34E-12 | 11367  |
| hydrophobin SC4                                                                                                                                                                         | -1.15          | 8.97E-1 | -1.12         | 9.19E-1 | -4                            | 2.21E-1 | -126            | 3.62E-5  | -130           | 3.41E-5  | 73533  |
| hydrophobin SC6                                                                                                                                                                         | -1.66          | 1.47E-1 | -2.11         | 3.75E-2 | -6.96                         | 1.93E-5 | -1.19           | 6.09E-1  | 1.07           | 8.32E-1  | 13059  |
| hydrophobin SC15                                                                                                                                                                        | -1.93          | 4.25E-1 | -1.69         | 5.21E-1 | -9.34                         | 1.28E-2 | -50             | 1.45E-5  | -57            | 1.04E-5  | 82353  |
| hydrophobin Hyd2                                                                                                                                                                        | 1.23           | 5.11E-1 | 2.12          | 2.83E-2 | -8.88                         | 2.39E-6 | -2.4            | 1.28E-2  | -4.1           | 3.13E-5  | 56457  |
| hydrophobin Hyd4                                                                                                                                                                        | 1.29           | 6.03E-1 | 1.51          | 3.98E-1 | -16.6                         | 1.73E-5 | -5.49           | 2.29E-4  | -6.4           | 1.1E-4   | 51576  |
| hydrophobin Hyd8                                                                                                                                                                        | -1.3           | 3.24E-1 | -1.59         | 8.77E-3 | -4.72                         | 1.29E-5 | -1.88           | 2.48E-3  | -1.5           | 1.14E-1  | 105121 |

**Table S10:** Blastp results. Function show the first results, which are not “hypothetical” or “predicted” or “expressed” protein (protein IDs from Tab. S6).

| Protein IDs | Putative function                                                      | Accession #    | Query coverage and Evalue |
|-------------|------------------------------------------------------------------------|----------------|---------------------------|
| 64664       | <i>aax4</i> ; protein of unknown function                              |                |                           |
| 27681       | secreted protein [ <i>Melampsora larici-populina</i> 98AG31]           | EGG07858.1     | Coverage 92% EValue 1e-48 |
| 237981      | vomeronal 1 receptor monDomV1R1217 [ <i>Monodelphis domestica</i> ]    | NP_001160971.1 | Coverage 32% EValue 0.32  |
| 105141      | F-Box containing protein. similar ones found in several Agaricomycetes |                |                           |
| 85939       | complement regulator acquiring protein 1 [ <i>Borrelia</i> ]           | AAU08838.1     | Coverage 18% EValue 3.1   |

|        |                                                                                                                                                                                       |                |                            |
|--------|---------------------------------------------------------------------------------------------------------------------------------------------------------------------------------------|----------------|----------------------------|
|        | <i>burgdorferi</i> ]                                                                                                                                                                  |                |                            |
| 81398  | colicin I receptor [ <i>Stenotrophomonas sp.</i> SKA14]                                                                                                                               | ZP_05136417.1  | Coverage 70% EValue 3.3    |
| 50388  | ubiquitin ligase protein MIB2. putative [ <i>Pediculus humanus corporis</i> ]                                                                                                         | XP_002431228.1 | Coverage 91% EValue 2.1    |
| 231319 | integral membrane protein [ <i>Mycoplasma penetrans</i> HF-2]                                                                                                                         | NP_757710.1    | Coverage 37% EValue 4.2    |
| 107950 | Nnf1 superfamily. polyamine-modulated factor 1 [ <i>Xenopus (Silurana) tropicalis</i> ]                                                                                               | NP_001107702.1 | Coverage 81% EValue 5e-06  |
| 50742  | DUF544 superfamily. protein of unknown function                                                                                                                                       |                |                            |
| 231457 | Nuclear transport factor 2 (NTF2) family protein [ <i>Arabidopsis thaliana</i> ]                                                                                                      | NP_568142.1    | Coverage 67% EValue 8e-10  |
| 80832  | DUF89 domain-containing protein [ <i>Coprinopsis cinerea okayama7#130</i> ]                                                                                                           | XP_001829216.1 | Coverage 98% EValue 0.0    |
| 256679 | Glycosyl transferase. family 2 [ <i>Crocospaera watsonii</i> WH 8501]                                                                                                                 | ZP_00517983.1  | Coverage 30% EValue 2.3    |
| 109956 | hypothetical protein                                                                                                                                                                  |                |                            |
| 46742  | RTA1 domain protein [ <i>Aspergillus oryzae</i> RIB40]                                                                                                                                | XP_001727792.1 | Coverage 94% EValue 2e-121 |
| 53069  | spore wall assembly-related protein [ <i>Cryptococcus gattii</i> WM276]                                                                                                               | XP_003193763.1 | Coverage 98% EValue 9e-97  |
| 236328 | gamma-glutamyltranspeptidase [ <i>Alteromonas macleodii</i> str. 'Deep ecotype']                                                                                                      | YP_004427352.1 | Coverage 65% EValue 0.86   |
| 256094 | telomeric DNA binding protein [ <i>Coprinopsis cinerea okayama 7#130</i> ]                                                                                                            | XP_001833597.1 | Coverage 98% EValue 0.0    |
| 233957 | hypothetical protein                                                                                                                                                                  |                |                            |
| 84078  | nucleoside H <sup>+</sup> symporter (3-phenylpropionic acid transporter). membrane protein [ <i>Pseudomonas brassicacearum subsp. brassicacearum</i> NFM421]                          | YP_004354876.1 | Coverage 36% EValue 3.5    |
| 255445 | hypothetical protein                                                                                                                                                                  |                |                            |
| 103746 | GG21300 [ <i>Drosophila erecta</i> ] DAAF1_DROER Dynein assembly factor 1. axonemal homolog. Defective transmitter-recycling proteinLeucine-rich repeat-containing protein 50 homolog | XP_001974037.1 | Coverage 32% EValue 9.0    |
| 108947 | phosphoribosylglycinamide synthetase [ <i>Schizophyllum commune</i> H4-8]                                                                                                             | XP_003029395.1 | Coverage 49% EValue 1e-77  |
| 105541 | hypothetical protein CC1G_13966 [ <i>Coprinopsis cinerea okayama7#130</i> ]. LabA_like protein                                                                                        | XP_002911926.1 | Coverage 69% EValue 6e-17  |
